# Supplementary material for: Novel insight into lepidopteran phylogenetics from the mitochondrial genome of the apple fruit moth of the family Argyresthiidae
Source: BMC Genomics. 2024 Jan 2;25:21. doi: 10.1186/s12864-023-09905-1 (PMC10759517; doi:10.1186/s12864-023-09905-1)
Supplement: Supplementary file 1 — Additional file 1: Table S1. List of mitochondrial genomes of Lepidoptera (including A. conjugella mitochondrial genome) investigated in the study, representing 18 superfamilies and 42 families (Supplementary Figure S2), including outgroups species ( Phryganea cinerea, Phryganopsyche latipennis, Cheumatopsyche brevilineata, Limnephilus hyalinus, and Stenopsyche angustata). [file 12864_2023_9905_MOESM1_ESM.xlsx]

## Sheet: Ark2
Organism	Acceesion	Sequence length	Clade	Superfamily	Family	T%	C%	A%	G%	A+T%	AT skew	GC skew
Manduca sexta	EU286785.1	15516	Ditrysia	Bombycoidea	Sphingidae	41.1	10.8	40.7	7.5	#REF!	#REF!	#REF!
Eriogyna pyretorum	FJ685653.1	15327	Ditrysia	Bombycoidea	Saturniidae	41.6	11.6	39.2	7.6	#REF!	#REF!	#REF!
Actias selene	JX186589.1	15236	Ditrysia	Bombycoidea	Saturniidae	40.4	13	38.5	8.1	#REF!	#REF!	#REF!
Sphinx morio	KC470083.1	15299	Ditrysia	Bombycoidea	Sphingidae	40.5	11.3	40.6	7.6	#REF!	#REF!	#REF!
Samia cynthia cynthia	KC812618.1	15345	Ditrysia	Bombycoidea	Saturniidae	40.3	12.3	39.6	7.8	#REF!	#REF!	#REF!
Attacus atlas	KF006326.1	15282	Ditrysia	Bombycoidea	Saturniidae	39.5	12.8	39.8	7.9	#REF!	#REF!	#REF!
Actias artemis aliena	KF927042.1	15243	Ditrysia	Bombycoidea	Saturniidae	39.8	13.4	38.8	8	#REF!	#REF!	#REF!
Samia canningi	KJ159909.1	15384	Ditrysia	Bombycoidea	Saturniidae	40.2	12.3	39.6	7.8	#REF!	#REF!	#REF!
Bombyx huttoni	KP216766.1	15638	Ditrysia	Bombycoidea	Bombycidae	38	11.1	43.8	7.1	#REF!	#REF!	#REF!
Ampelophaga rubiginosa	KT153024.1	15282	Ditrysia	Bombycoidea	Sphingidae	40.1	11	41.4	7.5	#REF!	#REF!	#REF!
Rondotia menciana	KT258908.1	15636	Ditrysia	Bombycoidea	Bombycidae	40.2	10.6	42	7.2	#REF!	#REF!	#REF!
Antheraea assamensis	KU379695.1	15272	Ditrysia	Bombycoidea	Saturniidae	40.8	12.1	39.4	7.7	#REF!	#REF!	#REF!
Dendrolimus spectabilis	KU558688.1	15409	Ditrysia	Bombycoidea	Lasiocampidae	38.6	12.6	40.8	8	#REF!	#REF!	#REF!
Euthrix laeta	KU870700.1	15368	Ditrysia	Bombycoidea	Lasiocampidae	39.3	12	40.9	7.8	#REF!	#REF!	#REF!
Trabala vishnou guttata	KU884483.1	15281	Ditrysia	Bombycoidea	Lasiocampidae	40.6	11.6	40.3	7.6	#REF!	#REF!	#REF!
Notonagemia analis scribae	KU934302.1	15303	Ditrysia	Bombycoidea	Sphingidae	39.1	12	41.1	7.8	#REF!	#REF!	#REF!
Andraca theae	KX365419.1	15737	Ditrysia	Bombycoidea	Bombycidae	38	13.9	40.3	7.8	#REF!	#REF!	#REF!
Kunugia undans	KX822016.1	15570	Ditrysia	Bombycoidea	Lasiocampidae	37.9	13.6	40.7	7.7	#REF!	#REF!	#REF!
Triuncina daii	KY091643.1	15482	Ditrysia	Bombycoidea	Bombycidae	40.7	11.3	40.9	7.2	#REF!	#REF!	#REF!
Cricula trifenestrata	KY644697.1	15425	Ditrysia	Bombycoidea	Saturniidae	38.4	14.2	39.3	8.1	#REF!	#REF!	#REF!
Saturnia boisduvalii	MF034742.1	15257	Ditrysia	Bombycoidea	Saturniidae	40.3	12.6	39	8.1	#REF!	#REF!	#REF!
Andraca olivacea	MF100135.1	15880	Ditrysia	Bombycoidea	Bombycidae	38.5	12.9	41.1	7.6	#REF!	#REF!	#REF!
Comparmustilia sphingiformis	MF100137.1	15100	Ditrysia	Bombycoidea	Bombycidae	39	12.1	41.1	7.8	#REF!	#REF!	#REF!
Dendrolimus kikuchii	MF100138.1	15382	Ditrysia	Bombycoidea	Lasiocampidae	37.8	13.4	40.9	7.9	#REF!	#REF!	#REF!
Ernolatia moorei	MF100139.1	15377	Ditrysia	Bombycoidea	Bombycidae	39.7	11.8	41	7.4	#REF!	#REF!	#REF!
Ganisa cyanogrisea	MF100140.1	15250	Ditrysia	Bombycoidea	Eupterotidae	39.8	12.8	39.7	7.7	#REF!	#REF!	#REF!
Mustilizans hepatica	MF100141.1	15745	Ditrysia	Bombycoidea	Bombycidae	39.4	12	40.8	7.8	#REF!	#REF!	#REF!
Mustilia undulosa	MF100142.1	15720	Ditrysia	Bombycoidea	Bombycidae	38.9	12.3	41.3	7.5	#REF!	#REF!	#REF!
Oberthueria jiatongae	MF100143.1	15673	Ditrysia	Bombycoidea	Bombycidae	39.3	12.4	40.4	7.9	#REF!	#REF!	#REF!
Ocinara albicollis	MF100144.1	15439	Ditrysia	Bombycoidea	Bombycidae	40.5	11.2	40.8	7.4	#REF!	#REF!	#REF!
Prismosticta fenestrata	MF100145.1	15772	Ditrysia	Bombycoidea	Endromidae	39.9	11.2	41.2	7.6	#REF!	#REF!	#REF!
Prismostictoides unihyala	MF100146.1	15355	Ditrysia	Bombycoidea	Endromidae	38.7	12.7	40.7	8	#REF!	#REF!	#REF!
Rinaca jonasii	MF346379.1	15261	Ditrysia	Bombycoidea	Saturniidae	40.5	12.5	39	8.1	#REF!	#REF!	#REF!
Neoris haraldi	MF664471.1	15383	Ditrysia	Bombycoidea	Saturniidae	40.3	12.4	39.4	7.9	#REF!	#REF!	#REF!
Psilogramma increta	MF974243.1	15252	Ditrysia	Bombycoidea	Sphingidae	39.2	12	41.2	7.7	#REF!	#REF!	#REF!
Brahmaea certhia	MG018026.1	15429	Ditrysia	Bombycoidea	Brahmaeidae	40.2	11.6	40.7	7.5	#REF!	#REF!	#REF!
Samia ricini	MK050556.1	15388	Ditrysia	Bombycoidea	Saturniidae	40.2	12.3	39.7	7.8	#REF!	#REF!	#REF!
Bombyx mandarina	MK246424.1	15769	Ditrysia	Bombycoidea	Bombycidae	38.4	11.2	43	7.3	#REF!	#REF!	#REF!
Bombyx mori	MK295812.1	15677	Ditrysia	Bombycoidea	Bombycidae	38.3	11.3	43.1	7.3	#REF!	#REF!	#REF!
Antheraea pernyi x Antherea roylei	MK920216.1	15573	Ditrysia	Bombycoidea	Saturniidae	40.9	12.1	39.3	7.7	#REF!	#REF!	#REF!
Dendrolimus houi	MK952760.1	15443	Ditrysia	Bombycoidea	Lasiocampidae	38.8	12.5	41.2	7.6	#REF!	#REF!	#REF!
Rotunda rotundapex	MN698791.1	15298	Ditrysia	Bombycoidea	Bombycidae	37.7	13.1	41.6	7.7	#REF!	#REF!	#REF!
Rhodinia fugax	MT548575.1	15334	Ditrysia	Bombycoidea	Saturniidae	40.6	11.7	40	7.7	#REF!	#REF!	#REF!
Saturnia japonica	MT614593.1	15376	Ditrysia	Bombycoidea	Saturniidae	41.3	11.8	39.4	7.6	#REF!	#REF!	#REF!
Antheraea pernyi	MT890592.1	15572	Ditrysia	Bombycoidea	Saturniidae	40.9	12	39.3	7.7	#REF!	#REF!	#REF!
Actias dubernardi	MW133617.1	15270	Ditrysia	Bombycoidea	Saturniidae	39.6	13.5	38.7	8.3	#REF!	#REF!	#REF!
Attacus atlas formosanus	MZ098706.1	15280	Ditrysia	Bombycoidea	Saturniidae	39.6	12.9	39.8	7.7	#REF!	#REF!	#REF!
Rhodoprasina callantha	MZ343573.1	15343	Ditrysia	Bombycoidea	Sphingidae	39.1	11.7	41.7	7.5	#REF!	#REF!	#REF!
Dahira obliquifascia	MZ343807.1	15939	Ditrysia	Bombycoidea	Sphingidae	39	12.4	41.3	7.3	#REF!	#REF!	#REF!
Theretra alecto	MZ562563.1	15287	Ditrysia	Bombycoidea	Sphingidae	41.3	7.4	39.4	11.9	#REF!	#REF!	#REF!
Theretra clotho	MZ562564.1	15318	Ditrysia	Bombycoidea	Sphingidae	41	7.4	39.9	11.7	#REF!	#REF!	#REF!
Trabala vishnou	MZ927091.1	15282	Ditrysia	Bombycoidea	Lasiocampidae	40.6	11.7	40.1	7.6	#REF!	#REF!	#REF!
Bombyx lemeepauli	NC_037149.1	15801	Ditrysia	Bombycoidea	Bombycidae	37.5	11.9	43.2	7.4	#REF!	#REF!	#REF!
Macroglossum stellatarum	NC_037441.1	15290	Ditrysia	Bombycoidea	Sphingidae	40.5	11.2	40.7	7.6	#REF!	#REF!	#REF!
Theretra oldenlandiae	NC_057303.1	15312	Ditrysia	Bombycoidea	Sphingidae	39.4	12.3	40.6	7.7	#REF!	#REF!	#REF!
Ambulyx liturata	NC_062106.1	15361	Ditrysia	Bombycoidea	Sphingidae	39.2	11.3	42	7.5	#REF!	#REF!	#REF!
Polyptychus trilineatus	NC_062109.1	15289	Ditrysia	Bombycoidea	Sphingidae	39.9	11.3	41.1	7.7	#REF!	#REF!	#REF!
Antheraea formosana	OK078922.1	15318	Ditrysia	Bombycoidea	Saturniidae	40.9	12	39.3	7.8	#REF!	#REF!	#REF!
Theretra japonica	OK149238.1	15393	Ditrysia	Bombycoidea	Sphingidae	39.2	12.3	41.2	7.4	#REF!	#REF!	#REF!
Antheraea yamamai	OM214002.1	15340	Ditrysia	Bombycoidea	Saturniidae	41.1	12	39.3	7.7	#REF!	#REF!	#REF!
Pterodecta felderi	MT370823.1	15340	Ditrysia	Calliduloidea	Callidulidae	39.3	12.7	40	7.9	#REF!	#REF!	#REF!
Carposina sasakii	HQ840719.1	15611	Ditrysia	Copromorphoidea	Carposinidae	39.5	10.7	42	7.8	#REF!	#REF!	#REF!
Zeuzera multistrigata	MF491642.1	15260	Ditrysia	Cossoidea	Cossidae	39.2	13.1	39.7	7.9	#REF!	#REF!	#REF!
Oreta fuscopurpurea	MG572766.1	15564	Ditrysia	Drepanoidea	Drepanidae	39.2	12.3	40.4	8.1	#REF!	#REF!	#REF!
Epicopeia hainesii	MK033610.1	15395	Ditrysia	Drepanoidea	Epicopeiidae	39.6	11.8	41	7.6	#REF!	#REF!	#REF!
Tethea albicostata	NC_061643.1	15308	Ditrysia	Drepanoidea	Drepanidae	40.3	11.6	40.3	7.9	#REF!	#REF!	#REF!
Pectinophora gossypiella	KM225795.1	15202	Ditrysia	Gelechioidea	Gelechiidae	40.6	11.6	40.1	7.7	#REF!	#REF!	#REF!
Tecia solanivora	KT326187.1	15251	Ditrysia	Gelechioidea	Gelechiidae	39.6	13.3	38.6	8.4	#REF!	#REF!	#REF!
Helcystogramma macroscopa	KT354968.1	15394	Ditrysia	Gelechioidea	Gelechiidae	39.9	11.3	41	7.7	#REF!	#REF!	#REF!
Atrijuglans hetaohei	KT581634.1	15379	Ditrysia	Gelechioidea	Stathmopodidae	42.1	11.1	39.3	7.6	#REF!	#REF!	#REF!
Hieromantis kurokoi	KU605775.1	15208	Ditrysia	Gelechioidea	Stathmopodidae	41.9	11.9	38.3	7.9	#REF!	#REF!	#REF!
Stathmopoda auriferella	KX138529.1	15456	Ditrysia	Gelechioidea	Oecophoridae	43.1	11.1	38.3	7.4	#REF!	#REF!	#REF!
Scythris sinensis	MH230111.1	15216	Ditrysia	Gelechioidea	Scythrididae	42.2	11.4	38.7	7.7	#REF!	#REF!	#REF!
Coleophora therinella	MH473596.1	15539	Ditrysia	Gelechioidea	Coleophoridae	41.6	11.8	39.1	7.5	#REF!	#REF!	#REF!
Promalactis odaiensis	MK210633.1	15733	Ditrysia	Gelechioidea	Oecophoridae	41.9	12.9	37.5	7.7	#REF!	#REF!	#REF!
Opisina arenosella	MK467611.1	15389	Ditrysia	Gelechioidea	Oecophoridae	41.3	12	39.2	7.4	#REF!	#REF!	#REF!
Tuta absoluta	MK654754.1	15290	Ditrysia	Gelechioidea	Gelechiidae	40.5	12	39.2	8.2	#REF!	#REF!	#REF!
Casmara patrona	MW006609.1	15393	Ditrysia	Gelechioidea	Oecophoridae	40.4	13.3	38.8	7.5	#REF!	#REF!	#REF!
Meleonoma mirabilis	MW366996.1	15268	Ditrysia	Gelechioidea	Cosmopterigidae	40	14.8	37.1	8.2	#REF!	#REF!	#REF!
Ripeacma umbellata	MW366997.1	15486	Ditrysia	Gelechioidea	Oecophoridae	41.1	12.5	38.8	7.6	#REF!	#REF!	#REF!
Phthorimaea operculella	MW540822.1	15269	Ditrysia	Gelechioidea	Gelechiidae	41	11.5	39.6	7.9	#REF!	#REF!	#REF!
Promalactis suzukiella	NC_026697.1	15507	Ditrysia	Gelechioidea	Oecophoridae	41.8	10.9	39.7	7.6	#REF!	#REF!	#REF!
Sitotroga cerealella	NC_041123.1	15312	Ditrysia	Gelechioidea	Gelechiidae	40.9	11.8	39.6	7.7	#REF!	#REF!	#REF!
Issikiopteryx taipingensis	ON323501.1	15234	Ditrysia	Gelechioidea	Lecithoceridae	41.5	12.4	38.4	7.7	#REF!	#REF!	#REF!
Monochroa sp.	ON323502.1	15299	Ditrysia	Gelechioidea	Gelechiidae	40.9	12.5	39	7.7	#REF!	#REF!	#REF!
Parachronistis sp.	ON323503.1	15212	Ditrysia	Gelechioidea	Gelechiidae	41.1	12	39	7.9	#REF!	#REF!	#REF!
Phthonandria atrilineata	EU569764.1	15499	Ditrysia	Geometroidea	Geometridae	40.2	11.3	40.8	7.7	#REF!	#REF!	#REF!
Biston panterinaria	JX406146.1	15517	Ditrysia	Geometroidea	Geometridae	37.2	12.9	42.3	7.6	#REF!	#REF!	#REF!
Biston thibetaria	KJ670146.1	15484	Ditrysia	Geometroidea	Geometridae	37.2	12.8	42.4	7.5	#REF!	#REF!	#REF!
Biston suppressaria	KP278206.1	15628	Ditrysia	Geometroidea	Geometridae	37.5	12.8	41.9	7.8	#REF!	#REF!	#REF!
Abraxas suspecta	KY095828.1	15537	Ditrysia	Geometroidea	Geometridae	39.6	11.4	41.3	7.7	#REF!	#REF!	#REF!
Ectropis obliqua	MF417804.1	15475	Ditrysia	Geometroidea	Geometridae	40.2	11.2	40.7	7.8	#REF!	#REF!	#REF!
Hypomecis punctinalis	MH311778.1	15629	Ditrysia	Geometroidea	Geometridae	38.7	12.3	41.1	7.9	#REF!	#REF!	#REF!
Iotaphora admirabilis	MK903032.1	16140	Ditrysia	Geometroidea	Geometridae	39.8	10.3	42.5	7.4	#REF!	#REF!	#REF!
Erannis ankeraria	MN046105.1	15250	Ditrysia	Geometroidea	Geometridae	38	12.3	41.3	8.4	#REF!	#REF!	#REF!
Acropteris iphiata	MN093120.1	15346	Ditrysia	Geometroidea	Uraniidae	37.9	11.5	43.1	7.5	#REF!	#REF!	#REF!
Milionia basalis	MN495623.1	15901	Ditrysia	Geometroidea	Geometridae	40.6	10.5	41.6	7.3	#REF!	#REF!	#REF!
Pasiphila chloerata	MN598218.1	15602	Ditrysia	Geometroidea	Geometridae	40.5	11.6	40.1	7.8	#REF!	#REF!	#REF!
Idaea effusaria	MN646772.1	16161	Ditrysia	Geometroidea	Geometridae	41	10.7	41.1	7.2	#REF!	#REF!	#REF!
Idaea simplicior	MN715151.1	15950	Ditrysia	Geometroidea	Geometridae	41.1	10.7	40.9	7.3	#REF!	#REF!	#REF!
Biston thoracicaria	MN956510.1	15538	Ditrysia	Geometroidea	Geometridae	39	11.4	42	7.6	#REF!	#REF!	#REF!
Hydrelia parvulata	MN962739.1	15407	Ditrysia	Geometroidea	Geometridae	40.4	11.6	39.8	8.2	#REF!	#REF!	#REF!
Ectropis grisescens	MW337302.1	15794	Ditrysia	Geometroidea	Geometridae	39.5	11.3	41.3	7.9	#REF!	#REF!	#REF!
Lyssa zampa	MZ713634.1	15571	Ditrysia	Geometroidea	Uraniidae	40.2	11	41.6	7.3	#REF!	#REF!	#REF!
Amraica recursaria	MZ713635.1	15609	Ditrysia	Geometroidea	Geometridae	39.8	11	41.6	7.6	#REF!	#REF!	#REF!
Cleora fraterna	MZ779035.1	15513	Ditrysia	Geometroidea	Geometridae	38.7	12.2	41	8.1	#REF!	#REF!	#REF!
Tanaorhinus viridiluteata	MZ927090.1	16397	Ditrysia	Geometroidea	Geometridae	38.9	10.9	42.8	7.4	#REF!	#REF!	#REF!
Operophtera brumata	NC_027723.1	15748	Ditrysia	Geometroidea	Geometridae	39.8	12.1	40.2	7.9	#REF!	#REF!	#REF!
Biston regalis	NC_061644.1	15532	Ditrysia	Geometroidea	Geometridae	39	11.8	41.7	7.5	#REF!	#REF!	#REF!
Chorodna fulgurita	NC_062108.1	15719	Ditrysia	Geometroidea	Geometridae	39.6	10.8	41.9	7.7	#REF!	#REF!	#REF!
Ophthalmitis albosignaria	OK235308.1	15569	Ditrysia	Geometroidea	Geometridae	39.6	11.1	41.8	7.5	#REF!	#REF!	#REF!
Macrosoma conifera	NC_050856.1	15344	Ditrysia	Hedyloidea	Hedylidae	41.2	10.9	40.5	7.5	#REF!	#REF!	#REF!
Pyrgus malvae	BK013352.1	15380	Ditrysia	Hesperioidea	Hesperiidae	41.2	10.9	40.5	7.4	#REF!	#REF!	#REF!
Ochlodes venata	HM243593.1	15622	Ditrysia	Hesperioidea	Hesperiidae	41.4	10.7	40.6	7.4	#REF!	#REF!	#REF!
Ctenoptilum vasava	JF713818.1	15468	Ditrysia	Hesperioidea	Hesperiidae	41.5	11.7	39.1	7.7	#REF!	#REF!	#REF!
Parnara guttata	JX101619.1	15441	Ditrysia	Hesperioidea	Hesperiidae	40.7	11.8	39.9	7.6	#REF!	#REF!	#REF!
Choaspes benjaminii	JX101620.1	15272	Ditrysia	Hesperioidea	Hesperiidae	40.7	11.7	40.1	7.5	#REF!	#REF!	#REF!
Erynnis montanus	KC659955.1	15530	Ditrysia	Hesperioidea	Hesperiidae	40.9	10.8	40.8	7.5	#REF!	#REF!	#REF!
Daimio tethys	KJ813807.1	15341	Ditrysia	Hesperioidea	Hesperiidae	39.7	13	39.5	7.9	#REF!	#REF!	#REF!
Ampittia dioscorides	KM102732.1	15313	Ditrysia	Hesperioidea	Hesperiidae	40	12	40.1	7.9	#REF!	#REF!	#REF!
Hasora anura	KR189008.1	15290	Ditrysia	Hesperioidea	Hesperiidae	39.7	12.5	39.8	8	#REF!	#REF!	#REF!
Lerema accius	KT598278.1	15338	Ditrysia	Hesperioidea	Hesperiidae	41.3	11.6	39.5	7.6	#REF!	#REF!	#REF!
Tagiades vajuna	KX865091.1	15359	Ditrysia	Hesperioidea	Hesperiidae	40.7	12.4	39	7.9	#REF!	#REF!	#REF!
Hasora badra	MK238674.1	15324	Ditrysia	Hesperioidea	Hesperiidae	40.1	12.5	39.6	7.8	#REF!	#REF!	#REF!
Hasora vitta	MK238675.1	15290	Ditrysia	Hesperioidea	Hesperiidae	40.4	12.2	39.6	7.8	#REF!	#REF!	#REF!
Leptalina unicolor	MK265705.1	15854	Ditrysia	Hesperioidea	Hesperiidae	40	11.4	41.3	7.4	#REF!	#REF!	#REF!
Hasora chromus	MN182753.1	15413	Ditrysia	Hesperioidea	Hesperiidae	40.1	12.4	39.5	7.9	#REF!	#REF!	#REF!
Abraximorpha davidii	MT371044.1	15469	Ditrysia	Hesperioidea	Hesperiidae	41.4	11.2	40.2	7.3	#REF!	#REF!	#REF!
Pelopidas mathias	MW264491.1	15524	Ditrysia	Hesperioidea	Hesperiidae	40.8	11.6	40.1	7.5	#REF!	#REF!	#REF!
Erionota torus	MW586888.1	15987	Ditrysia	Hesperioidea	Hesperiidae	41.5	11.5	39.7	7.3	#REF!	#REF!	#REF!
Celaenorrhinus maculosa	NC_022853.1	15282	Ditrysia	Hesperioidea	Hesperiidae	39.9	12.4	40	7.7	#REF!	#REF!	#REF!
Heteropterus morpheus	NC_028506.1	15769	Ditrysia	Hesperioidea	Hesperiidae	40.7	11.1	40.7	7.6	#REF!	#REF!	#REF!
Ochrogaster lunifer	AM946601.1	15593	Ditrysia	Noctuoidea	Notodontidae	37.7	14.6	40.1	7.6	#REF!	#REF!	#REF!
Lymantria dispar	FJ617240.1	15569	Ditrysia	Noctuoidea	Erebidae	39.3	12.6	40.6	7.6	#REF!	#REF!	#REF!
Helicoverpa armigera	GU188273.1	15347	Ditrysia	Noctuoidea	Noctuidae	40.4	11.3	40.5	7.7	#REF!	#REF!	#REF!
Hyphantria cunea	GU592049.1	15481	Ditrysia	Noctuoidea	Erebidae	39.8	12.1	40.6	7.6	#REF!	#REF!	#REF!
Phalera flavescens	JF440342.1	15659	Ditrysia	Noctuoidea	Notodontidae	40.8	11.3	40.1	7.9	#REF!	#REF!	#REF!
Spodoptera exigua	JX316220.1	15365	Ditrysia	Noctuoidea	Noctuidae	40.1	11.4	40.9	7.7	#REF!	#REF!	#REF!
Gynaephora menyuanensis	KC185412.1	15770	Ditrysia	Noctuoidea	Erebidae	40.6	11.8	40.9	6.8	#REF!	#REF!	#REF!
Asota plana lacteata	KJ173908.1	15416	Ditrysia	Noctuoidea	Erebidae	40.3	12.2	40.1	7.5	#REF!	#REF!	#REF!
Eutelia adulatricoides	KJ185131.1	15360	Ditrysia	Noctuoidea	Euteliidae	40.7	11.3	40.2	7.8	#REF!	#REF!	#REF!
Vamuna virilis	KJ364659.1	15417	Ditrysia	Noctuoidea	Erebidae	40.2	12.1	40.2	7.6	#REF!	#REF!	#REF!
Gabala argentata	KJ410747.1	15337	Ditrysia	Noctuoidea	Nolidae	42	10.7	39.6	7.6	#REF!	#REF!	#REF!
Catocala sp. XY-2014	KJ432280.1	15671	Ditrysia	Noctuoidea	Erebidae	41.4	11.6	39.7	7.3	#REF!	#REF!	#REF!
Euproctis pseudoconspersa	KJ716847.1	15461	Ditrysia	Noctuoidea	Erebidae	39.5	12.5	40.4	7.6	#REF!	#REF!	#REF!
Helicoverpa zea	KJ930516.1	15343	Ditrysia	Noctuoidea	Noctuidae	40.4	11.4	40.6	7.6	#REF!	#REF!	#REF!
Mythimna separata	KM099034.1	15329	Ditrysia	Noctuoidea	Noctuidae	41	11.3	40	7.7	#REF!	#REF!	#REF!
Striacosta albicosta	KM488268.1	15553	Ditrysia	Noctuoidea	Noctuidae	39.2	12.8	40.1	7.9	#REF!	#REF!	#REF!
Lemyra melli	KP307017.1	15418	Ditrysia	Noctuoidea	Erebidae	39.3	13.1	39.4	8.3	#REF!	#REF!	#REF!
Callimorpha dominula	KP973953.1	15496	Ditrysia	Noctuoidea	Erebidae	40.9	11.4	40.1	7.6	#REF!	#REF!	#REF!
Spilarctia subcarnea	KT258909.1	15441	Ditrysia	Noctuoidea	Erebidae	39.8	12.3	40	8	#REF!	#REF!	#REF!
Euproctis similis	KT258910.1	15437	Ditrysia	Noctuoidea	Erebidae	40.1	12.3	40.1	7.5	#REF!	#REF!	#REF!
Clostera anachoreta	KX108766.1	15456	Ditrysia	Noctuoidea	Notodontidae	41.1	11.7	39.6	7.6	#REF!	#REF!	#REF!
Spilarctia alba	KX753670.1	15447	Ditrysia	Noctuoidea	Erebidae	41.1	11.4	39.8	7.6	#REF!	#REF!	#REF!
Eudocima phalonia	KY196412.1	15575	Ditrysia	Noctuoidea	Erebidae	40.8	11.8	39.8	7.5	#REF!	#REF!	#REF!
Protegira songi	KY379907.1	15410	Ditrysia	Noctuoidea	Noctuidae	40.1	11.9	40.1	7.9	#REF!	#REF!	#REF!
Grammodes geometrica	KY888135.1	15728	Ditrysia	Noctuoidea	Erebidae	40.4	11.9	40.1	7.6	#REF!	#REF!	#REF!
Euproctis cryptosticta	KY996558.1	15462	Ditrysia	Noctuoidea	Erebidae	39.5	12.5	40.4	7.6	#REF!	#REF!	#REF!
Athetis lepigone	MF152835.1	15589	Ditrysia	Noctuoidea	Noctuidae	41.6	11.1	39.7	7.6	#REF!	#REF!	#REF!
Sinna extrema	MG872330.1	15345	Ditrysia	Noctuoidea	Nolidae	40.7	11.4	40.1	7.8	#REF!	#REF!	#REF!
Mythimna pallidicosta	MH027985.1	15320	Ditrysia	Noctuoidea	Noctuidae	40.3	11.9	39.9	7.8	#REF!	#REF!	#REF!
Somena scintillans	MH051839.1	15410	Ditrysia	Noctuoidea	Erebidae	40.8	12	40.1	7.2	#REF!	#REF!	#REF!
Clostera anastomosis	MH286069.1	15390	Ditrysia	Noctuoidea	Notodontidae	40.4	12.2	39.7	7.8	#REF!	#REF!	#REF!
Thaumetopoea pityocampa	MH286070.1	15737	Ditrysia	Noctuoidea	Notodontidae	37.3	14.6	40.5	7.6	#REF!	#REF!	#REF!
Spilosoma lubricipeda	MH311776.1	15375	Ditrysia	Noctuoidea	Erebidae	41.3	11.3	40.1	7.3	#REF!	#REF!	#REF!
Lymantria mathura	MH388824.2	15506	Ditrysia	Noctuoidea	Erebidae	40.4	7.6	37.5	14.4	#REF!	#REF!	#REF!
Trichoplusia ni	MK358044.1	15257	Ditrysia	Noctuoidea	Noctuidae	41.6	11.5	38.9	8	#REF!	#REF!	#REF!
Spodoptera frugiperda	MN094786.1	15353	Ditrysia	Noctuoidea	Noctuidae	42.2	10.9	39.4	7.6	#REF!	#REF!	#REF!
Eilema ussuricum	MN696172.1	15344	Ditrysia	Noctuoidea	Erebidae	40.3	12	40.2	7.6	#REF!	#REF!	#REF!
Catocala electa	MN698265.1	15575	Ditrysia	Noctuoidea	Erebidae	41.7	11.4	39.6	7.3	#REF!	#REF!	#REF!
Anarta trifolii	MN715147.1	15281	Ditrysia	Noctuoidea	Noctuidae	41.3	10.7	40.2	7.7	#REF!	#REF!	#REF!
Laelia suffusa	MN908152.1	15502	Ditrysia	Noctuoidea	Erebidae	40.1	7.4	38.9	13.6	#REF!	#REF!	#REF!
Euproctis seitzi	MN916588.1	15276	Ditrysia	Noctuoidea	Erebidae	41.9	11.5	39.5	7.1	#REF!	#REF!	#REF!
Spirama retorta	MT013356.1	15652	Ditrysia	Noctuoidea	Erebidae	41.2	11.8	39.6	7.4	#REF!	#REF!	#REF!
Lacanobia aliena	MT040605.1	15400	Ditrysia	Noctuoidea	Noctuidae	39.1	11.7	41.5	7.6	#REF!	#REF!	#REF!
Spodoptera littoralis	MT816470.1	15408	Ditrysia	Noctuoidea	Noctuidae	40	11.3	41	7.6	#REF!	#REF!	#REF!
Spodoptera exempta	MT906792.1	15457	Ditrysia	Noctuoidea	Noctuidae	40.7	10.7	40.9	7.6	#REF!	#REF!	#REF!
Diachrysia nadeja	MT916722.1	15242	Ditrysia	Noctuoidea	Noctuidae	41.4	11.6	39.1	7.9	#REF!	#REF!	#REF!
Leucoma chrysoscela	MW030505.1	15508	Ditrysia	Noctuoidea	Erebidae	40.6	11.7	40.2	7.4	#REF!	#REF!	#REF!
Orgyia postica	MW355619.1	15258	Ditrysia	Noctuoidea	Erebidae	39.7	7.9	37.5	14.8	#REF!	#REF!	#REF!
Arctia plantaginis	MW394229.1	15479	Ditrysia	Noctuoidea	Erebidae	41	11.8	39.7	7.4	#REF!	#REF!	#REF!
Periacma orthiodes	MW697075.1	15306	Ditrysia	Noctuoidea	Noctuidae	42.6	11.8	37.8	7.7	#REF!	#REF!	#REF!
Agrotis munda	MZ397914.1	15402	Ditrysia	Noctuoidea	Noctuidae	41.1	11.1	40.1	7.6	#REF!	#REF!	#REF!
Nyctemera adversata	MZ562560.1	15429	Ditrysia	Noctuoidea	Erebidae	39.6	13.2	39.6	7.6	#REF!	#REF!	#REF!
Thyas honesta	MZ562561.1	15582	Ditrysia	Noctuoidea	Erebidae	42.3	10.7	39.6	7.3	#REF!	#REF!	#REF!
Arcte coerula	MZ562562.1	15265	Ditrysia	Noctuoidea	Erebidae	39.7	13	39.2	8.1	#REF!	#REF!	#REF!
Acronicta major	MZ562565.1	15401	Ditrysia	Noctuoidea	Noctuidae	38.2	13.1	40.8	8	#REF!	#REF!	#REF!
Condica illecta	MZ562566.1	15364	Ditrysia	Noctuoidea	Noctuidae	40.9	11.3	40.1	7.7	#REF!	#REF!	#REF!
Calliteara horishanella	MZ571364.1	15467	Ditrysia	Noctuoidea	Erebidae	39	12.9	40.5	7.6	#REF!	#REF!	#REF!
Xanthodes intersepta	MZ571408.1	15366	Ditrysia	Noctuoidea	Noctuidae	41.3	10.7	40.3	7.7	#REF!	#REF!	#REF!
Athetis thoracica	MZ571409.1	15364	Ditrysia	Noctuoidea	Noctuidae	41.8	11	39.5	7.6	#REF!	#REF!	#REF!
Condica capensis	MZ571410.1	15312	Ditrysia	Noctuoidea	Noctuidae	40.7	11.2	40.2	7.8	#REF!	#REF!	#REF!
Risoba prominens	MZ618262.1	15345	Ditrysia	Noctuoidea	Nolidae	40.8	11.1	40.3	7.8	#REF!	#REF!	#REF!
Spodoptera litura	MZ618263.1	15382	Ditrysia	Noctuoidea	Noctuidae	40	11.3	41	7.6	#REF!	#REF!	#REF!
Helicoverpa assulta	MZ618264.1	15410	Ditrysia	Noctuoidea	Noctuidae	40.7	11.4	40.3	7.6	#REF!	#REF!	#REF!
Asota caricae	MZ779033.1	15409	Ditrysia	Noctuoidea	Erebidae	40.3	12.2	40	7.5	#REF!	#REF!	#REF!
Actebia praecox	MZ853167.1	15382	Ditrysia	Noctuoidea	Noctuidae	40.7	11.5	40.1	7.7	#REF!	#REF!	#REF!
Mythimna loreyi	MZ853169.1	15312	Ditrysia	Noctuoidea	Noctuidae	41.1	11.4	39.8	7.6	#REF!	#REF!	#REF!
Amerila alberti	MZ927092.1	15503	Ditrysia	Noctuoidea	Erebidae	40.5	11.8	40.1	7.6	#REF!	#REF!	#REF!
Asota plana	MZ927093.1	15421	Ditrysia	Noctuoidea	Erebidae	40.2	12.2	40.1	7.5	#REF!	#REF!	#REF!
Calyptra minuticornis	MZ944874.1	15931	Ditrysia	Noctuoidea	Erebidae	41.3	10.9	40.6	7.2	#REF!	#REF!	#REF!
Artena dotata	MZ944875.1	15629	Ditrysia	Noctuoidea	Erebidae	41.2	11.9	39.5	7.4	#REF!	#REF!	#REF!
Asota paliura	MZ944876.1	15399	Ditrysia	Noctuoidea	Erebidae	40.2	12.3	40	7.6	#REF!	#REF!	#REF!
Spilarctia casigneta	MZ959068.1	15402	Ditrysia	Noctuoidea	Erebidae	40.2	12.2	40.2	7.4	#REF!	#REF!	#REF!
Daddala lucilla	MZ959069.1	15643	Ditrysia	Noctuoidea	Erebidae	41.3	11.7	39.5	7.5	#REF!	#REF!	#REF!
Agrotis ipsilon	MZ959071.1	15379	Ditrysia	Noctuoidea	Noctuidae	40.8	11.1	40.4	7.7	#REF!	#REF!	#REF!
Parallelia stuposa	MZ959072.1	15682	Ditrysia	Noctuoidea	Erebidae	40.5	12.1	39.9	7.5	#REF!	#REF!	#REF!
Chilkasa falcata	MZ959073.1	15603	Ditrysia	Noctuoidea	Erebidae	41.4	11.5	39.6	7.5	#REF!	#REF!	#REF!
Erebus caprimulgus	MZ964411.1	15963	Ditrysia	Noctuoidea	Erebidae	41.9	11.6	39.2	7.3	#REF!	#REF!	#REF!
Pareuchaetes insulata	MZ964412.1	15299	Ditrysia	Noctuoidea	Erebidae	41.3	11.8	39.3	7.6	#REF!	#REF!	#REF!
Chrysopera combinans	MZ964413.1	15815	Ditrysia	Noctuoidea	Erebidae	41	11.3	40.2	7.5	#REF!	#REF!	#REF!
Tiracola plagiata	MZ964414.1	15377	Ditrysia	Noctuoidea	Noctuidae	40.4	12	39.5	8	#REF!	#REF!	#REF!
Sesamia inferens	NC_015835.1	15413	Ditrysia	Noctuoidea	Noctuidae	40.2	12.2	40.1	7.6	#REF!	#REF!	#REF!
Helicoverpa punctigera	NC_023791.1	15382	Ditrysia	Noctuoidea	Noctuidae	40.7	11.1	40.7	7.6	#REF!	#REF!	#REF!
Hydrillodes lentalis	NC_041106.1	15570	Ditrysia	Noctuoidea	Erebidae	41.4	11.4	39.7	7.5	#REF!	#REF!	#REF!
Athetis pallidipennis	NC_046525.1	15344	Ditrysia	Noctuoidea	Noctuidae	41.5	11.3	39.5	7.7	#REF!	#REF!	#REF!
Ctenoplusia albostriata	NC_053742.1	15284	Ditrysia	Noctuoidea	Noctuidae	41.3	11.3	39.6	7.8	#REF!	#REF!	#REF!
Spodoptera depravata	NC_061562.1	15460	Ditrysia	Noctuoidea	Noctuidae	40.6	10.8	41	7.6	#REF!	#REF!	#REF!
Simplicia rectalis	NC_061563.1	15546	Ditrysia	Noctuoidea	Erebidae	41.1	11.5	40	7.4	#REF!	#REF!	#REF!
Imosca coreana	NC_061564.1	15417	Ditrysia	Noctuoidea	Noctuidae	39.8	11.8	40.7	7.7	#REF!	#REF!	#REF!
Pyrrhia umbra	NC_061565.1	15370	Ditrysia	Noctuoidea	Noctuidae	40.3	11.3	40.6	7.8	#REF!	#REF!	#REF!
Sphragifera sigillata	NC_061640.1	15368	Ditrysia	Noctuoidea	Noctuidae	41.3	10.8	40.2	7.6	#REF!	#REF!	#REF!
Mocis ancilla	NC_061641.1	15726	Ditrysia	Noctuoidea	Erebidae	41.1	11.6	40	7.3	#REF!	#REF!	#REF!
Pheosia rimosa	NC_061645.1	15510	Ditrysia	Noctuoidea	Notodontidae	38.9	12.7	40.6	7.8	#REF!	#REF!	#REF!
Mamestra brassicae	NC_061705.1	15342	Ditrysia	Noctuoidea	Noctuidae	40.8	11.1	40.4	7.7	#REF!	#REF!	#REF!
Olene inclusa	NC_062102.1	15486	Ditrysia	Noctuoidea	Erebidae	40.2	12.4	39.8	7.7	#REF!	#REF!	#REF!
Tiracola aureata	NC_062103.1	15384	Ditrysia	Noctuoidea	Noctuidae	40.8	11.9	39.4	7.9	#REF!	#REF!	#REF!
Eligma narcissus	NC_062104.1	15346	Ditrysia	Noctuoidea	Nolidae	40	11.5	40.9	7.7	#REF!	#REF!	#REF!
Anomis mesogona	NC_062105.1	15626	Ditrysia	Noctuoidea	Erebidae	40.7	11.3	40.4	7.6	#REF!	#REF!	#REF!
Actinotia intermediata	NC_062107.1	15352	Ditrysia	Noctuoidea	Noctuidae	41	10.9	40.5	7.7	#REF!	#REF!	#REF!
Eucarta virgo	NC_062110.1	15435	Ditrysia	Noctuoidea	Noctuidae	42.1	10.4	40	7.6	#REF!	#REF!	#REF!
Peridea elzet	NC_062111.1	15210	Ditrysia	Noctuoidea	Notodontidae	39.9	11.8	40.4	7.9	#REF!	#REF!	#REF!
Cosmia restituta	NC_062112.1	15408	Ditrysia	Noctuoidea	Noctuidae	40.3	12	39.7	8	#REF!	#REF!	#REF!
Melanchra persicariae	NC_062113.1	15355	Ditrysia	Noctuoidea	Noctuidae	41.1	11.1	40.2	7.5	#REF!	#REF!	#REF!
Simplicia niphona	NC_062114.1	15552	Ditrysia	Noctuoidea	Erebidae	41.1	11.5	40	7.4	#REF!	#REF!	#REF!
Agrotis trifurca	NC_062115.1	15390	Ditrysia	Noctuoidea	Noctuidae	40.2	11.6	40.4	7.7	#REF!	#REF!	#REF!
Earias clorana	NC_062116.1	15561	Ditrysia	Noctuoidea	Nolidae	41.7	11.1	39.7	7.5	#REF!	#REF!	#REF!
Acronicta rumicis	NC_062117.1	15388	Ditrysia	Noctuoidea	Noctuidae	40.3	11.7	40.4	7.7	#REF!	#REF!	#REF!
Niphonyx segregata	NC_062119.1	15322	Ditrysia	Noctuoidea	Noctuidae	40.1	11.9	40.3	7.7	#REF!	#REF!	#REF!
Abrostola triplasia	NC_062120.1	15363	Ditrysia	Noctuoidea	Noctuidae	40.8	11.5	39.9	7.7	#REF!	#REF!	#REF!
Syntypistis chambae	NC_062123.1	15938	Ditrysia	Noctuoidea	Notodontidae	39.4	11.3	41.9	7.4	#REF!	#REF!	#REF!
Cucullia pustulata	NC_062181.1	15378	Ditrysia	Noctuoidea	Noctuidae	41	11.1	40.6	7.4	#REF!	#REF!	#REF!
Phragmatobia fuliginosa	NC_062183.1	15469	Ditrysia	Noctuoidea	Erebidae	40.8	11.6	40.2	7.4	#REF!	#REF!	#REF!
Pseudoips prasinana	NC_062184.1	15239	Ditrysia	Noctuoidea	Nolidae	41.3	11.3	39.4	7.9	#REF!	#REF!	#REF!
Leucoma salicis	NC_063089.1	15334	Ditrysia	Noctuoidea	Erebidae	38.5	12.2	42.1	7.2	#REF!	#REF!	#REF!
Neocerura liturata	OK094456.1	15427	Ditrysia	Noctuoidea	Notodontidae	38.6	12.5	41.4	7.4	#REF!	#REF!	#REF!
Sasakia charonda kuriyamaensis	AP011825.1	15222	Ditrysia	Papilionoidea	Nymphalidae	40.2	12.2	39.7	7.9	#REF!	#REF!	#REF!
Coreana raphaelis	DQ102703.1	15314	Ditrysia	Papilionoidea	Lycaenidae	43.3	10	39.4	7.3	#REF!	#REF!	#REF!
Papilio maraho	FJ810212.1	16094	Ditrysia	Papilionoidea	Papilionidae	40	12.3	40.5	7.2	#REF!	#REF!	#REF!
Telchinia issoria	GQ376195.1	15245	Ditrysia	Papilionoidea	Nymphalidae	40.8	12.5	38.9	7.7	#REF!	#REF!	#REF!
Pieris rapae	GQ398376.1	15164	Ditrysia	Papilionoidea	Pieridae	39.3	12.5	40.4	7.8	#REF!	#REF!	#REF!
Melitaea cinxia	GQ398377.1	15170	Ditrysia	Papilionoidea	Nymphalidae	39.7	12.4	40.3	7.5	#REF!	#REF!	#REF!
Parnassius bremeri	HM243588.1	15390	Ditrysia	Papilionoidea	Papilionidae	41.3	11.3	39.8	7.6	#REF!	#REF!	#REF!
Cigaritis takanonis	HQ184266.1	15349	Ditrysia	Papilionoidea	Lycaenidae	41	10.7	41.3	6.9	#REF!	#REF!	#REF!
Abisara fylloides	HQ259069.1	15301	Ditrysia	Papilionoidea	Riodinidae	41.7	11.3	39.5	7.5	#REF!	#REF!	#REF!
Sericinus montela	HQ259122.1	15242	Ditrysia	Papilionoidea	Papilionidae	40.8	11.6	40.1	7.4	#REF!	#REF!	#REF!
Calinaga davidis	HQ658143.1	15267	Ditrysia	Papilionoidea	Nymphalidae	42	11.7	38.4	7.8	#REF!	#REF!	#REF!
Argynnis hyperbius	JF439070.1	15156	Ditrysia	Papilionoidea	Nymphalidae	41.4	11.7	39.4	7.5	#REF!	#REF!	#REF!
Fabriciana nerippe	JF504707.1	15140	Ditrysia	Papilionoidea	Nymphalidae	41.5	11.6	39.4	7.5	#REF!	#REF!	#REF!
Apatura metis	JF801742.1	15236	Ditrysia	Papilionoidea	Nymphalidae	40.7	11.8	39.8	7.7	#REF!	#REF!	#REF!
Melanitis leda	JF905446.1	15122	Ditrysia	Papilionoidea	Nymphalidae	41.4	12.5	38.4	7.7	#REF!	#REF!	#REF!
Papilio bianor	JN019809.1	15340	Ditrysia	Papilionoidea	Papilionidae	40.9	11.8	39.7	7.7	#REF!	#REF!	#REF!
Kallima inachus	JN857943.1	15183	Ditrysia	Papilionoidea	Nymphalidae	40.7	11.9	39.6	7.8	#REF!	#REF!	#REF!
Athyma sulpitia	JQ347260.1	15268	Ditrysia	Papilionoidea	Nymphalidae	42.9	10.6	39	7.4	#REF!	#REF!	#REF!
Sasakia funebris	JX131328.1	15233	Ditrysia	Papilionoidea	Nymphalidae	41.3	11.2	39.9	7.6	#REF!	#REF!	#REF!
Cupido argiades	KC310728.1	15330	Ditrysia	Papilionoidea	Lycaenidae	41.4	10.6	40.4	7.6	#REF!	#REF!	#REF!
Hebomoia glaucippe	KC489093.1	15701	Ditrysia	Papilionoidea	Pieridae	41.4	12.2	38.5	7.9	#REF!	#REF!	#REF!
Timelaea maculata	KC572131.1	15178	Ditrysia	Papilionoidea	Nymphalidae	42	11.3	39.1	7.6	#REF!	#REF!	#REF!
Danaus plexippus	KC836923.1	15314	Ditrysia	Papilionoidea	Nymphalidae	42.6	11.2	38.7	7.4	#REF!	#REF!	#REF!
Luehdorfia taibai	KC952673.1	15553	Ditrysia	Papilionoidea	Papilionidae	41.1	11.1	40.4	7.4	#REF!	#REF!	#REF!
Junonia orithya	KF199862.1	15214	Ditrysia	Papilionoidea	Nymphalidae	40.9	11.6	39.5	8	#REF!	#REF!	#REF!
Danaus chrysippus	KF690637.1	15236	Ditrysia	Papilionoidea	Nymphalidae	41.4	12.1	38.9	7.5	#REF!	#REF!	#REF!
Parnassius apollo	KF746065.1	15404	Ditrysia	Papilionoidea	Papilionidae	41.3	11.1	40	7.6	#REF!	#REF!	#REF!
Davidina armandi	KF881046.1	15214	Ditrysia	Papilionoidea	Nymphalidae	40.7	12.6	39	7.7	#REF!	#REF!	#REF!
Eurema hecabe	KF881047.1	15112	Ditrysia	Papilionoidea	Pieridae	41.4	11.9	39.2	7.5	#REF!	#REF!	#REF!
Gonepteryx mahaguru	KF881048.1	15221	Ditrysia	Papilionoidea	Pieridae	41.8	11.5	39.1	7.7	#REF!	#REF!	#REF!
Ninguta schrenckii	KF881052.1	15261	Ditrysia	Papilionoidea	Nymphalidae	42.2	12.2	38	7.7	#REF!	#REF!	#REF!
Callerebia suroia	KF906483.1	15208	Ditrysia	Papilionoidea	Nymphalidae	41.4	12.5	38.1	8	#REF!	#REF!	#REF!
Elymnias hypermnestra	KF906484.1	15167	Ditrysia	Papilionoidea	Nymphalidae	42	11.7	38.5	7.8	#REF!	#REF!	#REF!
Lethe dura	KF906485.1	15259	Ditrysia	Papilionoidea	Nymphalidae	41	12.9	38.2	7.9	#REF!	#REF!	#REF!
Melanargia asiatica	KF906486.1	15142	Ditrysia	Papilionoidea	Nymphalidae	40.9	13	38.1	8	#REF!	#REF!	#REF!
Triphysa phryne	KF906487.1	15143	Ditrysia	Papilionoidea	Nymphalidae	40.8	12.8	38	8.4	#REF!	#REF!	#REF!
Lamproptera curius	KJ141168.1	15277	Ditrysia	Papilionoidea	Papilionidae	40.6	11.7	39.9	7.9	#REF!	#REF!	#REF!
Papilio syfanius	KJ396621.1	15359	Ditrysia	Papilionoidea	Papilionidae	41.1	11.7	39.5	7.7	#REF!	#REF!	#REF!
Graphium mullah	KJ472924.1	15226	Ditrysia	Papilionoidea	Papilionidae	40.5	11.7	39.8	7.9	#REF!	#REF!	#REF!
Ideopsis similis	KJ476729.1	15200	Ditrysia	Papilionoidea	Nymphalidae	42.5	11.2	39.1	7.3	#REF!	#REF!	#REF!
Atrophaneura alcinous	KJ540880.1	15266	Ditrysia	Papilionoidea	Papilionidae	42.5	11.5	38.6	7.4	#REF!	#REF!	#REF!
Pararge aegeria aegeria	KJ547676.1	15240	Ditrysia	Papilionoidea	Nymphalidae	41.6	11.8	38.9	7.7	#REF!	#REF!	#REF!
Apodemia mormo	KJ647171.1	15262	Ditrysia	Papilionoidea	Riodinidae	42.7	11	38.9	7.5	#REF!	#REF!	#REF!
Euploea midamus	KJ866207.1	15187	Ditrysia	Papilionoidea	Nymphalidae	41.9	11.6	39	7.5	#REF!	#REF!	#REF!
Heliconius pachinus	KM014809.1	15369	Ditrysia	Papilionoidea	Nymphalidae	42	11.1	39.2	7.7	#REF!	#REF!	#REF!
Heliconius hecale	KM068091.1	15338	Ditrysia	Papilionoidea	Nymphalidae	42.2	10.9	39.5	7.5	#REF!	#REF!	#REF!
Papilio polytes	KM215138.1	15260	Ditrysia	Papilionoidea	Papilionidae	40.7	11.9	39.5	7.9	#REF!	#REF!	#REF!
Parnassius epaphus	KM373898.1	15458	Ditrysia	Papilionoidea	Papilionidae	41.4	11.1	40	7.5	#REF!	#REF!	#REF!
Hamadryas epinome	KM378244.1	15207	Ditrysia	Papilionoidea	Nymphalidae	42	11	39.5	7.5	#REF!	#REF!	#REF!
Parnassius imperator	KM507326.1	15424	Ditrysia	Papilionoidea	Papilionidae	41.1	11.4	40	7.5	#REF!	#REF!	#REF!
Japonica lutea	KM655768.1	15225	Ditrysia	Papilionoidea	Lycaenidae	42.8	10.4	39.3	7.6	#REF!	#REF!	#REF!
Heliconius melpomene rosina	KP100653.1	15327	Ditrysia	Papilionoidea	Nymphalidae	42.3	10.9	39.3	7.5	#REF!	#REF!	#REF!
Parnassius cephalus	KP100655.1	15343	Ditrysia	Papilionoidea	Papilionidae	41.2	11.1	40.2	7.5	#REF!	#REF!	#REF!
Graphium chironides	KP159289.1	15235	Ditrysia	Papilionoidea	Papilionidae	40.8	11.9	39.6	7.7	#REF!	#REF!	#REF!
Papilio helenus	KP247522.1	15607	Ditrysia	Papilionoidea	Papilionidae	40.6	12.2	39.6	7.6	#REF!	#REF!	#REF!
Stichophthalma louisa	KP247523.1	15721	Ditrysia	Papilionoidea	Nymphalidae	41	12.9	38.7	7.4	#REF!	#REF!	#REF!
Heliconius sara	KP281778.1	15372	Ditrysia	Papilionoidea	Nymphalidae	41.3	11.6	39.4	7.8	#REF!	#REF!	#REF!
Chitoria ulupi	KP284554.1	15279	Ditrysia	Papilionoidea	Nymphalidae	41	12.4	38.9	7.8	#REF!	#REF!	#REF!
Heliconius ismenius	KP294327.1	15346	Ditrysia	Papilionoidea	Nymphalidae	41.8	11.3	39.4	7.5	#REF!	#REF!	#REF!
Colias erate	KP715146.1	15184	Ditrysia	Papilionoidea	Pieridae	41.4	11.2	39.9	7.5	#REF!	#REF!	#REF!
Teinopalpus imperialis	KR018842.1	15229	Ditrysia	Papilionoidea	Papilionidae	40	12.6	39.6	7.8	#REF!	#REF!	#REF!
Euripus nyctelius	KR020515.1	15417	Ditrysia	Papilionoidea	Nymphalidae	40.2	12.2	39.7	7.8	#REF!	#REF!	#REF!
Papilio demoleus	KR024009.1	15249	Ditrysia	Papilionoidea	Papilionidae	41.6	11.3	39.3	7.8	#REF!	#REF!	#REF!
Cethosia biblis	KR066948.1	15286	Ditrysia	Papilionoidea	Nymphalidae	42.8	11.9	37.4	7.9	#REF!	#REF!	#REF!
Idea leuconoe	KR815449.1	15278	Ditrysia	Papilionoidea	Nymphalidae	41.3	12	39.1	7.5	#REF!	#REF!	#REF!
Papilio glaucus	KR822739.1	15306	Ditrysia	Papilionoidea	Papilionidae	40.5	11.9	40	7.6	#REF!	#REF!	#REF!
Polyura schreiber	KT232257.1	15420	Ditrysia	Papilionoidea	Nymphalidae	41.9	11.3	39	7.8	#REF!	#REF!	#REF!
Herona marathus	KT279805.1	15487	Ditrysia	Papilionoidea	Nymphalidae	40.3	12.5	39.7	7.5	#REF!	#REF!	#REF!
Junonia coenia	KT380025.1	15222	Ditrysia	Papilionoidea	Nymphalidae	41.1	11.6	39.6	7.7	#REF!	#REF!	#REF!
Shijimiaeoides divina	KT897723.1	15259	Ditrysia	Papilionoidea	Lycaenidae	41.4	10.3	41	7.2	#REF!	#REF!	#REF!
Eurema blanda	KU160635.1	15123	Ditrysia	Papilionoidea	Pieridae	41.1	12.1	39.5	7.4	#REF!	#REF!	#REF!
Papilio xuthus	KU356933.1	15359	Ditrysia	Papilionoidea	Papilionidae	40.7	12	39.7	7.6	#REF!	#REF!	#REF!
Luehdorfia chinensis	KU360130.1	15550	Ditrysia	Papilionoidea	Papilionidae	41.1	11.2	40.3	7.3	#REF!	#REF!	#REF!
Junonia iphita	KU577290.1	15190	Ditrysia	Papilionoidea	Nymphalidae	41.1	11.6	39.6	7.8	#REF!	#REF!	#REF!
Tirumala limniace	KX889069.1	15278	Ditrysia	Papilionoidea	Nymphalidae	42.8	11.7	38.1	7.5	#REF!	#REF!	#REF!
Parnassius choui	KY072797.1	15367	Ditrysia	Papilionoidea	Papilionidae	41.2	11.1	40.3	7.4	#REF!	#REF!	#REF!
Papilio protenor	KY272622.1	15268	Ditrysia	Papilionoidea	Papilionidae	41	12	39.5	7.5	#REF!	#REF!	#REF!
Limenitis doerriesi	KY569552.1	15233	Ditrysia	Papilionoidea	Nymphalidae	42.3	11.2	38.8	7.6	#REF!	#REF!	#REF!
Limenitis moltrechti	KY569554.1	15178	Ditrysia	Papilionoidea	Nymphalidae	41.8	11.7	39	7.5	#REF!	#REF!	#REF!
Limenitis amphyssa	KY569555.1	15164	Ditrysia	Papilionoidea	Nymphalidae	41.9	11.4	39	7.6	#REF!	#REF!	#REF!
Argynnis sagana	KY971464.1	15151	Ditrysia	Papilionoidea	Nymphalidae	41.7	11.4	39.3	7.6	#REF!	#REF!	#REF!
Nymphalis c-aureum	MF407452.1	15209	Ditrysia	Papilionoidea	Nymphalidae	40.5	11.9	40.1	7.5	#REF!	#REF!	#REF!
Apatura laverna	MF444860.1	15187	Ditrysia	Papilionoidea	Nymphalidae	40.2	12.2	39.7	7.9	#REF!	#REF!	#REF!
Parnassius nomion	MF496134.1	15362	Ditrysia	Papilionoidea	Papilionidae	41.3	11.1	40	7.6	#REF!	#REF!	#REF!
Neptis alwina	MG457128.1	15226	Ditrysia	Papilionoidea	Nymphalidae	42.3	11.1	38.9	7.7	#REF!	#REF!	#REF!
Vanessa indica	MG736927.1	15191	Ditrysia	Papilionoidea	Nymphalidae	39.9	12.3	40.1	7.6	#REF!	#REF!	#REF!
Lasiommata deidamia	MG880214.1	15244	Ditrysia	Papilionoidea	Nymphalidae	41.9	11.3	39.2	7.6	#REF!	#REF!	#REF!
Precis andremiaja	MH917706.1	15239	Ditrysia	Papilionoidea	Nymphalidae	40.5	12	39.9	7.6	#REF!	#REF!	#REF!
Salamis anteva	MH917707.1	15201	Ditrysia	Papilionoidea	Nymphalidae	40	11.8	40.6	7.6	#REF!	#REF!	#REF!
Graphium doson	MK144328.1	15285	Ditrysia	Papilionoidea	Papilionidae	41.1	11.5	39.8	7.6	#REF!	#REF!	#REF!
Pontia edusa	MK252290.1	15125	Ditrysia	Papilionoidea	Pieridae	40	12.2	39.9	7.9	#REF!	#REF!	#REF!
Delias pasithoe	MK252291.1	15203	Ditrysia	Papilionoidea	Pieridae	39.6	13.1	39.6	7.7	#REF!	#REF!	#REF!
Appias nero	MK263223.1	15099	Ditrysia	Papilionoidea	Pieridae	40.5	13.1	38.4	8.1	#REF!	#REF!	#REF!
Appias lyncida	MK263224.1	15082	Ditrysia	Papilionoidea	Pieridae	41.6	12.1	38.6	7.7	#REF!	#REF!	#REF!
Prioneris clemanthe	MK263225.1	15131	Ditrysia	Papilionoidea	Pieridae	41.3	11.9	39.5	7.4	#REF!	#REF!	#REF!
Minois dryas	MK521433.1	15195	Ditrysia	Papilionoidea	Nymphalidae	41.2	12.1	39	7.7	#REF!	#REF!	#REF!
Papilio machaon annae	MK602655.1	15339	Ditrysia	Papilionoidea	Papilionidae	41.5	11.6	39.4	7.6	#REF!	#REF!	#REF!
Troides aeacus formosanus	MK801139.1	15224	Ditrysia	Papilionoidea	Papilionidae	41.7	12.3	38.5	7.6	#REF!	#REF!	#REF!
Hestina assimilis	MN182752.1	15262	Ditrysia	Papilionoidea	Nymphalidae	41.1	11.4	40	7.5	#REF!	#REF!	#REF!
Mycalesis intermedia	MN610565.1	15386	Ditrysia	Papilionoidea	Nymphalidae	41.6	11.8	39.2	7.3	#REF!	#REF!	#REF!
Junonia stygia	MN623383.1	15233	Ditrysia	Papilionoidea	Nymphalidae	39.8	12.8	39.7	7.7	#REF!	#REF!	#REF!
Papilio paris	MN629008.1	15363	Ditrysia	Papilionoidea	Papilionidae	40.9	11.9	39.6	7.5	#REF!	#REF!	#REF!
Ypthima baldus	MN708051.1	15304	Ditrysia	Papilionoidea	Nymphalidae	42.2	11.7	38.6	7.5	#REF!	#REF!	#REF!
Parnassius mercurius	MN728989.1	15372	Ditrysia	Papilionoidea	Papilionidae	41.3	11.1	40.1	7.5	#REF!	#REF!	#REF!
Nymphalis ladakensis	MN732892.1	15222	Ditrysia	Papilionoidea	Nymphalidae	40.6	11.9	40	7.6	#REF!	#REF!	#REF!
Coenonympha amaryllis	MN756798.1	15125	Ditrysia	Papilionoidea	Nymphalidae	41.3	12.6	38.2	8	#REF!	#REF!	#REF!
Parantica aglea aglea	MN938921.1	15214	Ditrysia	Papilionoidea	Nymphalidae	41.2	12.7	38.4	7.7	#REF!	#REF!	#REF!
Plebejus argus	MN974526.1	15426	Ditrysia	Papilionoidea	Lycaenidae	41.3	10.4	40.8	7.4	#REF!	#REF!	#REF!
Hipparchia autonoe	MT090762.1	15300	Ditrysia	Papilionoidea	Nymphalidae	40.1	13.1	38.8	8	#REF!	#REF!	#REF!
Hestina persimilis	MT110153.1	15252	Ditrysia	Papilionoidea	Nymphalidae	41.2	11.5	39.7	7.6	#REF!	#REF!	#REF!
Hestinalis nama	MT110154.1	15208	Ditrysia	Papilionoidea	Nymphalidae	39.3	12.9	39.9	7.9	#REF!	#REF!	#REF!
Lopinga achine	MT117843.1	15284	Ditrysia	Papilionoidea	Nymphalidae	40.5	12.9	38.9	7.6	#REF!	#REF!	#REF!
Graphium parus	MT198821.1	15231	Ditrysia	Papilionoidea	Papilionidae	39.8	12.2	40.1	7.9	#REF!	#REF!	#REF!
Colias fieldii	MT371042.1	15150	Ditrysia	Papilionoidea	Pieridae	41.2	11.4	39.8	7.7	#REF!	#REF!	#REF!
Anthocharis scolymus	MT499329.1	15230	Ditrysia	Papilionoidea	Pieridae	41.5	11.9	38.9	7.6	#REF!	#REF!	#REF!
Pieris napi	MT576638.1	15178	Ditrysia	Papilionoidea	Pieridae	39.6	12.2	40.5	7.7	#REF!	#REF!	#REF!
Protogoniomorpha anacardii duprei	MT702382.1	15220	Ditrysia	Papilionoidea	Nymphalidae	39.9	12.3	40.1	7.7	#REF!	#REF!	#REF!
Kallimoides rumia	MT704827.1	15234	Ditrysia	Papilionoidea	Nymphalidae	40.8	11.6	40.1	7.5	#REF!	#REF!	#REF!
Doleschallia melana	MT704829.1	15269	Ditrysia	Papilionoidea	Nymphalidae	39.8	12.4	40.3	7.6	#REF!	#REF!	#REF!
Anartia jatrophae saturata	MT712074.1	15297	Ditrysia	Papilionoidea	Nymphalidae	42.3	11.1	39.1	7.5	#REF!	#REF!	#REF!
Araschnia levana	MT712075.1	15207	Ditrysia	Papilionoidea	Nymphalidae	41.2	10.9	40.5	7.4	#REF!	#REF!	#REF!
Dodona eugenes	MT890732.1	15680	Ditrysia	Papilionoidea	Riodinidae	41.3	11.1	39.7	7.9	#REF!	#REF!	#REF!
Pieris naganum	MW013541.1	15155	Ditrysia	Papilionoidea	Pieridae	39.8	12.4	39.9	7.9	#REF!	#REF!	#REF!
Ahlbergia ferrea	MW074891.1	15443	Ditrysia	Papilionoidea	Lycaenidae	43.1	9.8	39.8	7.3	#REF!	#REF!	#REF!
Ahlbergia frivaldszkyi	MW074892.1	15855	Ditrysia	Papilionoidea	Lycaenidae	43.2	9.8	39.8	7.2	#REF!	#REF!	#REF!
Kallima paralekta	MW192438.1	15200	Ditrysia	Papilionoidea	Nymphalidae	39.8	12.7	39.7	7.8	#REF!	#REF!	#REF!
Parantica sita	MW470953.1	15202	Ditrysia	Papilionoidea	Nymphalidae	41.6	12	39	7.4	#REF!	#REF!	#REF!
Baeotus beotus	MW566598.1	15131	Ditrysia	Papilionoidea	Nymphalidae	40.6	11.9	39.8	7.7	#REF!	#REF!	#REF!
Polyura narcaeus	MW683125.1	15319	Ditrysia	Papilionoidea	Nymphalidae	42.1	11.2	39.2	7.6	#REF!	#REF!	#REF!
Catacroptera cloanthe	MW722786.1	15204	Ditrysia	Papilionoidea	Nymphalidae	39.5	13.2	39.3	8	#REF!	#REF!	#REF!
Teinopalpus aureus wuyiensis	MW900433.1	15234	Ditrysia	Papilionoidea	Papilionidae	40	12.5	39.8	7.7	#REF!	#REF!	#REF!
Smyrna blomfildia	MZ151338.1	15149	Ditrysia	Papilionoidea	Nymphalidae	39.9	12.8	39.6	7.7	#REF!	#REF!	#REF!
Nymphalis io geisha	MZ322948.1	15252	Ditrysia	Papilionoidea	Nymphalidae	40.5	11.9	40.1	7.5	#REF!	#REF!	#REF!
Pachliopta aristolochiae	MZ781228.1	15235	Ditrysia	Papilionoidea	Papilionidae	42.3	11	39.3	7.3	#REF!	#REF!	#REF!
Diaethria gabaza eupepla	MZ981736.1	15156	Ditrysia	Papilionoidea	Nymphalidae	40.7	11.7	39.8	7.8	#REF!	#REF!	#REF!
Sasakia charonda	NC_014224.1	15244	Ditrysia	Papilionoidea	Nymphalidae	40.2	12.3	39.7	7.9	#REF!	#REF!	#REF!
Protantigius superans	NC_016016.1	15248	Ditrysia	Papilionoidea	Lycaenidae	42.3	10.7	39.4	7.6	#REF!	#REF!	#REF!
Issoria lathonia	NC_018030.1	15172	Ditrysia	Papilionoidea	Nymphalidae	41.8	11.2	39.3	7.6	#REF!	#REF!	#REF!
Papilio machaon	NC_018047.1	15185	Ditrysia	Papilionoidea	Papilionidae	41.4	11.8	38.9	7.9	#REF!	#REF!	#REF!
Papilio maackii	NC_021411.1	15357	Ditrysia	Papilionoidea	Papilionidae	40.9	11.7	39.8	7.6	#REF!	#REF!	#REF!
Pieris canidia	NC_026532.1	15153	Ditrysia	Papilionoidea	Pieridae	39.3	12.5	40.4	7.9	#REF!	#REF!	#REF!
Lethe albolineata	NC_028507.1	15248	Ditrysia	Papilionoidea	Nymphalidae	40.9	12.9	38.3	7.9	#REF!	#REF!	#REF!
Limenitis sydyi	NC_034233.1	15200	Ditrysia	Papilionoidea	Nymphalidae	42.1	11.3	39.1	7.5	#REF!	#REF!	#REF!
Limenitis helmanni	NC_034754.1	15178	Ditrysia	Papilionoidea	Nymphalidae	42.3	11.3	38.8	7.6	#REF!	#REF!	#REF!
Papilio memnon	NC_043911.1	15262	Ditrysia	Papilionoidea	Papilionidae	40.2	12.6	39.6	7.6	#REF!	#REF!	#REF!
Oeneis urda	NC_046889.1	15248	Ditrysia	Papilionoidea	Nymphalidae	40.9	12.2	39.1	7.9	#REF!	#REF!	#REF!
Lelecella limenitoides	NC_050060.1	15203	Ditrysia	Papilionoidea	Nymphalidae	41.8	10.9	39.7	7.5	#REF!	#REF!	#REF!
Mallika jacksoni	NC_050692.1	15193	Ditrysia	Papilionoidea	Nymphalidae	40.3	12.7	39.1	8	#REF!	#REF!	#REF!
Appias albina	NC_053734.1	15193	Ditrysia	Papilionoidea	Pieridae	40.9	12.4	38.6	8	#REF!	#REF!	#REF!
Papilio elwesi	OK052950.1	15082	Ditrysia	Papilionoidea	Papilionidae	39.4	12.9	40.1	7.6	#REF!	#REF!	#REF!
Graphium confucius	OK136253.1	15212	Ditrysia	Papilionoidea	Papilionidae	39.3	12.8	39.8	8.1	#REF!	#REF!	#REF!
Teinopalpus aureus	OL449692.1	15234	Ditrysia	Papilionoidea	Papilionidae	40	12.5	39.8	7.7	#REF!	#REF!	#REF!
Diatraea saccharalis	FJ240227.1	15490	Ditrysia	Pyraloidea	Crambidae	39.2	12.6	40.9	7.4	#REF!	#REF!	#REF!
Maruca vitrata	HM751150.1	14054	Ditrysia	Pyraloidea	Crambidae	39.9	11.8	40.1	8.2	#REF!	#REF!	#REF!
Chilo suppressalis	HQ860290.1	15465	Ditrysia	Pyraloidea	Crambidae	39.5	12.6	40.2	7.7	#REF!	#REF!	#REF!
Corcyra cephalonica	HQ897685.1	15273	Ditrysia	Pyraloidea	Pyralidae	41.7	11.9	38.8	7.6	#REF!	#REF!	#REF!
Cnaphalocrocis medinalis	JQ305693.1	15377	Ditrysia	Pyraloidea	Crambidae	41.9	10.5	40.1	7.5	#REF!	#REF!	#REF!
Paracymoriza prodigalis	JX144892.1	15326	Ditrysia	Pyraloidea	Crambidae	40.7	10.9	40.8	7.5	#REF!	#REF!	#REF!
Conogethes punctiferalis	JX448619.1	15355	Ditrysia	Pyraloidea	Crambidae	41.3	11.7	39.3	7.7	#REF!	#REF!	#REF!
Elophila interruptalis	KC894961.1	15351	Ditrysia	Pyraloidea	Crambidae	40.6	12.1	39.7	7.6	#REF!	#REF!	#REF!
Glyphodes quadrimaculalis	KF234079.1	15255	Ditrysia	Pyraloidea	Crambidae	40.7	11.4	40.1	7.8	#REF!	#REF!	#REF!
Scirpophaga incertulas	KF751706.1	15220	Ditrysia	Pyraloidea	Crambidae	37.5	15.1	39.7	7.8	#REF!	#REF!	#REF!
Paracymoriza distinctalis	KF859965.1	15354	Ditrysia	Pyraloidea	Crambidae	41.2	10.2	41	7.5	#REF!	#REF!	#REF!
Chilo auricilius	KJ174087.1	15367	Ditrysia	Pyraloidea	Crambidae	41.4	10.8	40.7	7.2	#REF!	#REF!	#REF!
Maruca testulalis	KJ623250.1	15110	Ditrysia	Pyraloidea	Crambidae	40.6	11.2	40.2	8	#REF!	#REF!	#REF!
Hellula undalis	KJ636057.1	14678	Ditrysia	Pyraloidea	Crambidae	40.5	12.2	39.4	8	#REF!	#REF!	#REF!
Spoladea recurvalis	KJ739310.1	15273	Ditrysia	Pyraloidea	Crambidae	41.4	11.3	39.5	7.8	#REF!	#REF!	#REF!
Ostrinia penitalis	KM395814.1	12612	Ditrysia	Pyraloidea	Crambidae	37.8	12.2	41.1	8.9	#REF!	#REF!	#REF!
Glyphodes pyloalis	KM576860.1	14960	Ditrysia	Pyraloidea	Crambidae	41	11.5	39.7	7.8	#REF!	#REF!	#REF!
Loxostege sticticalis	KR080490.1	15218	Ditrysia	Pyraloidea	Crambidae	40.3	11.4	40.5	7.8	#REF!	#REF!	#REF!
Haritalodes derogata	KR233479.1	15253	Ditrysia	Pyraloidea	Crambidae	40.3	11.8	40.4	7.5	#REF!	#REF!	#REF!
Pyrinioides aurea	KT337662.1	15362	Ditrysia	Pyraloidea	Thyrididae	40	12.2	40	7.9	#REF!	#REF!	#REF!
Amyelois transitella	KT692987.1	15205	Ditrysia	Pyraloidea	Pyralidae	41.7	12.6	37.9	7.8	#REF!	#REF!	#REF!
Pycnarmon lactiferalis	KX426346.1	15219	Ditrysia	Pyraloidea	Crambidae	41	10.7	40.7	7.6	#REF!	#REF!	#REF!
Euzophera pyriella	KY825744.1	15184	Ditrysia	Pyraloidea	Pyralidae	42	12.5	37.8	7.6	#REF!	#REF!	#REF!
Meroptera pravella	MF073207.1	15260	Ditrysia	Pyraloidea	Pyralidae	41.1	11.6	39.6	7.8	#REF!	#REF!	#REF!
Nagiella inferior	MF373813.1	15348	Ditrysia	Pyraloidea	Crambidae	40.4	11.3	41.1	7.2	#REF!	#REF!	#REF!
Ephestia elutella	MG748858.1	15346	Ditrysia	Pyraloidea	Pyralidae	42.1	11.8	38.6	7.6	#REF!	#REF!	#REF!
Omiodes indicata	MG770232.1	15367	Ditrysia	Pyraloidea	Crambidae	41.3	10.7	40.3	7.7	#REF!	#REF!	#REF!
Palpita hypohomalia	MH013483.1	15280	Ditrysia	Pyraloidea	Crambidae	40.5	11.4	40.5	7.6	#REF!	#REF!	#REF!
Ostrinia palustralis	MH574940.1	15246	Ditrysia	Pyraloidea	Crambidae	38.8	11.6	41.8	7.8	#REF!	#REF!	#REF!
Cydalima perspectalis	MH602288.1	15232	Ditrysia	Pyraloidea	Crambidae	41.1	11.4	39.8	7.7	#REF!	#REF!	#REF!
Cathayia obliquella	MK550620.1	15408	Ditrysia	Pyraloidea	Pyralidae	41.8	11.9	38.8	7.5	#REF!	#REF!	#REF!
Orthaga olivacea	MN078362.1	15174	Ditrysia	Pyraloidea	Pyralidae	41.2	12.8	37.8	8.2	#REF!	#REF!	#REF!
Pyralis farinalis	MN442120.1	15204	Ditrysia	Pyraloidea	Pyralidae	40.4	13.6	37.9	8	#REF!	#REF!	#REF!
Orthopygia glaucinalis	MN461479.1	15229	Ditrysia	Pyraloidea	Pyralidae	41.3	12.7	37.9	8.1	#REF!	#REF!	#REF!
Plodia interpunctella	MN619781.1	15403	Ditrysia	Pyraloidea	Pyralidae	42.1	12.2	38.2	7.5	#REF!	#REF!	#REF!
Loxostege aeruginalis	MN635734.1	15339	Ditrysia	Pyraloidea	Crambidae	39.6	12.1	40.5	7.8	#REF!	#REF!	#REF!
Loxostege turbidalis	MN646773.1	15240	Ditrysia	Pyraloidea	Crambidae	39.3	12.1	40.7	7.9	#REF!	#REF!	#REF!
Dioryctria yiai	MN658208.1	15430	Ditrysia	Pyraloidea	Pyralidae	42	11.3	39	7.7	#REF!	#REF!	#REF!
Ostrinia furnacalis	MN747041.1	15241	Ditrysia	Pyraloidea	Crambidae	39.2	11.4	41.7	7.7	#REF!	#REF!	#REF!
Marasmia exigua	MN877384.1	15262	Ditrysia	Pyraloidea	Crambidae	41.1	10.9	40.5	7.6	#REF!	#REF!	#REF!
Pyrausta despicata	MN956508.1	15389	Ditrysia	Pyraloidea	Crambidae	40.1	11.4	40.8	7.6	#REF!	#REF!	#REF!
Oncocera semirubella	MT012820.1	15290	Ditrysia	Pyraloidea	Pyralidae	41.7	11.1	39.7	7.6	#REF!	#REF!	#REF!
Lista haraldusalis	MT081380.1	15213	Ditrysia	Pyraloidea	Pyralidae	41.1	10.8	40.5	7.7	#REF!	#REF!	#REF!
Ostrinia nubilalis	MT492030.1	14838	Ditrysia	Pyraloidea	Crambidae	38.9	11.6	41.6	7.8	#REF!	#REF!	#REF!
Ostrinia kasmirica	MT978075.1	15214	Ditrysia	Pyraloidea	Crambidae	39.2	11.3	41.8	7.7	#REF!	#REF!	#REF!
Aglossa dimidiata	MW542312.1	15225	Ditrysia	Pyraloidea	Pyralidae	41.2	12.8	37.9	8.1	#REF!	#REF!	#REF!
Lamoria adaptella	MZ853170.1	15439	Ditrysia	Pyraloidea	Pyralidae	40.5	12.3	39.6	7.6	#REF!	#REF!	#REF!
Tyspanodes hypsalis	NC_025569.1	15329	Ditrysia	Pyraloidea	Crambidae	41.4	10.9	40	7.7	#REF!	#REF!	#REF!
Crambus perlellus	NC_061606.1	15440	Ditrysia	Pyraloidea	Crambidae	41	11.2	40.3	7.5	#REF!	#REF!	#REF!
Endotricha kuznetzovi	NC_061642.1	15244	Ditrysia	Pyraloidea	Pyralidae	41.7	11.6	39	7.6	#REF!	#REF!	#REF!
Sitochroa verticalis	NC_062118.1	15275	Ditrysia	Pyraloidea	Crambidae	40.1	11.7	40.5	7.8	#REF!	#REF!	#REF!
Choreutis emplecta	MG581932.1	14718	Ditrysia	Sesioidea	Choreutidae	40.8	11.4	39.9	7.9	#REF!	#REF!	#REF!
Sesia siningensis	MN708363.1	15454	Ditrysia	Sesioidea	Sesiidae	38.6	12.5	41	7.9	#REF!	#REF!	#REF!
Mahasena oolona	KY856825.1	16119	Ditrysia	Tineoidea	Psychidae	40.4	10.5	42.5	6.7	#REF!	#REF!	#REF!
Amorophaga japonica	MH823253.1	15027	Ditrysia	Tineoidea	Tineidae	39.4	10.9	42.3	7.5	#REF!	#REF!	#REF!
Monopis longella	MH992770.1	15541	Ditrysia	Tineoidea	Tineidae	42	11.2	39.8	7	#REF!	#REF!	#REF!
Caloptilia theivora	MK541932.1	15297	Ditrysia	Tineoidea	Gracillariidae	39.7	11.4	41	7.9	#REF!	#REF!	#REF!
Dahlica ochrostigma	MK890245.1	15429	Ditrysia	Tineoidea	Psychidae	39.1	11.1	42.8	7	#REF!	#REF!	#REF!
Gibbovalva kobusi	MK956103.1	15717	Ditrysia	Tineoidea	Gracillariidae	39.5	11.6	41	7.9	#REF!	#REF!	#REF!
Eumeta variegata	MN242985.1	15793	Ditrysia	Tineoidea	Psychidae	39.5	11.1	42.1	7.3	#REF!	#REF!	#REF!
Eudarcia gwangneungensis	MN413148.1	15391	Ditrysia	Tineoidea	Meessiidae	39.4	12.7	40.4	7.4	#REF!	#REF!	#REF!
Corythoxestis sunosei	MT611524.1	15511	Ditrysia	Tineoidea	Gracillariidae	41.7	10.6	40	7.6	#REF!	#REF!	#REF!
Acanthopsyche nigraplaga	MT883999.1	15704	Ditrysia	Tineoidea	Psychidae	39.3	13.1	40.7	7	#REF!	#REF!	#REF!
Adoxophyes honmai	DQ073916.1	15680	Ditrysia	Tortricoidea	Tortricidae	40.2	11.7	40.2	7.9	#REF!	#REF!	#REF!
Spilonota lechriaspis	HM204705.1	15368	Ditrysia	Tortricoidea	Tortricidae	41.3	11.2	39.9	7.6	#REF!	#REF!	#REF!
Grapholita molesta	HQ116416.1	15776	Ditrysia	Tortricoidea	Tortricidae	40.9	11	40.4	7.7	#REF!	#REF!	#REF!
Rhyacionia leptotubula	JX028270.1	15877	Ditrysia	Tortricoidea	Tortricidae	40.2	12.1	40.1	7.6	#REF!	#REF!	#REF!
Cydia pomonella	JX407107.2	15253	Ditrysia	Tortricoidea	Tortricidae	40.2	12	39.9	7.9	#REF!	#REF!	#REF!
Adoxophyes orana	JX872403.1	15343	Ditrysia	Tortricoidea	Tortricidae	40	12.1	39.9	7.9	#REF!	#REF!	#REF!
Grapholita dimorpha	KJ671625.1	15813	Ditrysia	Tortricoidea	Tortricidae	40.9	11.4	40	7.8	#REF!	#REF!	#REF!
Lobesia botrana	KP677508.1	15229	Ditrysia	Tortricoidea	Tortricidae	40	12	40.1	7.9	#REF!	#REF!	#REF!
Eudemis lucina	MK820027.1	16056	Ditrysia	Tortricoidea	Tortricidae	39.9	11.6	40.6	7.8	#REF!	#REF!	#REF!
Phiaris dolosana	MK962620.1	15562	Ditrysia	Tortricoidea	Tortricidae	39.9	11.7	40.6	7.8	#REF!	#REF!	#REF!
Celypha flavipalpana	MN956509.1	15498	Ditrysia	Tortricoidea	Tortricidae	39.8	11.8	40.5	7.9	#REF!	#REF!	#REF!
Grapholita delineana	MT165691.1	15599	Ditrysia	Tortricoidea	Tortricidae	40.4	11.2	40.6	7.8	#REF!	#REF!	#REF!
Celypha sp. DX-2020	MT548574.1	15691	Ditrysia	Tortricoidea	Tortricidae	40.2	11.4	40.6	7.8	#REF!	#REF!	#REF!
Cochylimorpha cultana	MW413306.1	15348	Ditrysia	Tortricoidea	Tortricidae	40.1	11.3	40.8	7.9	#REF!	#REF!	#REF!
Cochylidia moguntiana	MW413307.1	15433	Ditrysia	Tortricoidea	Tortricidae	39.8	11.4	40.8	8	#REF!	#REF!	#REF!
Eugnosta dives	MW491464.1	15392	Ditrysia	Tortricoidea	Tortricidae	40.3	11.7	40.2	7.7	#REF!	#REF!	#REF!
Clepsis pallidana	MZ636560.1	15679	Ditrysia	Tortricoidea	Tortricidae	40.1	11.1	41.2	7.7	#REF!	#REF!	#REF!
Plutella xylostella	JF911819.1	16179	Ditrysia	Yponomeutoidea	Plutellidae	40.5	10.9	40.9	7.7	#REF!	#REF!	#REF!
Leucoptera malifoliella	JN790955.1	15646	Ditrysia	Yponomeutoidea	Lyonetiidae	40.6	10.4	41.9	7	#REF!	#REF!	#REF!
Prays oleae	KM874804.1	16499	Ditrysia	Yponomeutoidea	Praydidae	40.1	10.7	41.7	7.5	#REF!	#REF!	#REF!
Argyresthia conjugella	ON496993.1	16044	Ditrysia	Yponomeutoidea	Argyresthiidae	41.2	10.6	40.8	7.4	#REF!	#REF!	#REF!
Monema flavescens	KY628213.1	15406	Ditrysia	Zygaenoidea	Limacodidae	39.7	11.9	40.8	7.6	#REF!	#REF!	#REF!
Pidorus atratus	MG882482.1	15383	Ditrysia	Zygaenoidea	Zygaenidae	39.5	12.1	40.3	8	#REF!	#REF!	#REF!
Narosa nigrisigna	MH675969.1	15292	Ditrysia	Zygaenoidea	Limacodidae	42.2	11.1	39	7.7	#REF!	#REF!	#REF!
Iragoides fasciata	MK250437.1	15645	Ditrysia	Zygaenoidea	Limacodidae	42	10.8	40	7.2	#REF!	#REF!	#REF!
Phauda flammans	MN150296.1	15470	Ditrysia	Zygaenoidea	Zygaenidae	41.9	10.8	40.1	7.1	#REF!	#REF!	#REF!
Illiberis ulmivora	MT075808.1	15334	Ditrysia	Zygaenoidea	Zygaenidae	41.9	11.2	39.6	7.4	#REF!	#REF!	#REF!
Illiberis pruni	MZ726799.1	15252	Ditrysia	Zygaenoidea	Zygaenidae	42.3	10.3	39.9	7.4	#REF!	#REF!	#REF!
Eterusia aedea	MZ964410.1	15192	Ditrysia	Zygaenoidea	Zygaenidae	40	12.4	39.6	8.1	#REF!	#REF!	#REF!
Histia rhodope	NC_039447.1	15209	Ditrysia	Zygaenoidea	Zygaenidae	38.7	13.4	39.8	8.2	#REF!	#REF!	#REF!
Amesia sanguiflua	NC_046467.1	15203	Ditrysia	Zygaenoidea	Zygaenidae	39.8	12.4	40	7.8	#REF!	#REF!	#REF!
Parasa consocia	OK149235.1	15548	Ditrysia	Zygaenoidea	Limacodidae	40.5	11.8	40.3	7.4	#REF!	#REF!	#REF!
Napialus hunanensis	KJ632465.1	15301	Exoporia	Hepialoidea	Hepialidae	41.2	10.6	40.7	7.6	#REF!	#REF!	#REF!
Thitarodes gonggaensis	KP718817.1	15940	Exoporia	Hepialoidea	Hepialidae	40.2	11.2	41.1	7.4	#REF!	#REF!	#REF!
Endoclita signifer	KT780172.1	15285	Exoporia	Hepialoidea	Hepialidae	41.4	10.5	40.5	7.6	#REF!	#REF!	#REF!
Hepialus xiaojinensis	KT834973.1	15397	Exoporia	Hepialoidea	Hepialidae	39.7	11.5	41.4	7.4	#REF!	#REF!	#REF!
Thitarodes sejilaensis	KU053201.1	15290	Exoporia	Hepialoidea	Hepialidae	40	11.6	40.9	7.5	#REF!	#REF!	#REF!
Thitarodes sp. XK-2016	KX527574.1	16280	Exoporia	Hepialoidea	Hepialidae	40.2	11.2	41	7.6	#REF!	#REF!	#REF!
Triodia sylvina	MH105794.1	15040	Exoporia	Hepialoidea	Hepialidae	41.2	10.4	41	7.5	#REF!	#REF!	#REF!
Thitarodes pui	MK599283.1	15928	Exoporia	Hepialoidea	Hepialidae	40.4	11.3	41	7.3	#REF!	#REF!	#REF!
Thitarodes damxungensis	MK648145.1	15362	Exoporia	Hepialoidea	Hepialidae	41.2	10.3	41.3	7.2	#REF!	#REF!	#REF!
Thitarodes sp.	MZ675586.1	15389	Exoporia	Hepialoidea	Hepialidae	40.8	10.4	41.5	7.2	#REF!	#REF!	#REF!
Thitarodes sp. n. ZW-2019	MZ675587.1	15612	Exoporia	Hepialoidea	Hepialidae	39.7	11.8	41.3	7.3	#REF!	#REF!	#REF!
Thitarodes sp.	MZ675588.1	15496	Exoporia	Hepialoidea	Hepialidae	39.6	11.8	41.2	7.4	#REF!	#REF!	#REF!
Thitarodes sp. HN19	OL470656.1	16055	Exoporia	Hepialoidea	Hepialidae	40.1	11.3	40.9	7.6	#REF!	#REF!	#REF!
Thitarodes sp. XS20	OL470657.1	14553	Exoporia	Hepialoidea	Hepialidae	40.5	10.7	41.2	7.6	#REF!	#REF!	#REF!
Cheumatopsyche brevilineata	KX385010.1	15302	Integripalpia	Hydropsychidae	Hydropsychinae	38.6	14.5	39.2	7.7	#REF!	#REF!	#REF!
Hydatophylax nigrovittatus	NC_043770.1	15048	Integripalpia	Limnephiloidea	Limnephilidae	36.7	15.8	38.9	8.5	#REF!	#REF!	#REF!
Limnephilus hyalinus	NC_044710.1	15168	Integripalpia	Limnephiloidea	Limnephilidae	38.4	13.9	39.5	8.1	#REF!	#REF!	#REF!
Phryganea cinerea	NC_039714.1	15043	Integripalpia	Phryganeoidea	Phryganeidae	39.1	14	39.2	7.7	#REF!	#REF!	#REF!
Phryganopsyche latipennis	NC_043771.1	15167	Integripalpia	Phryganeoidea	Phryganopsychidae	39.5	13.4	39.1	8.1	#REF!	#REF!	#REF!
Stenopsyche angustata	NC_051529.1	15371	Integripalpia	Stenopsychidae	Stenopsychinae	35	15.5	41.6	7.8	#REF!	#REF!	#REF!
Stenopsyche tienmushanensis	NC_058007.1	16049	Integripalpia	Stenopsychidae	Stenopsychinae	35.9	14.6	42	7.6	#REF!	#REF!	#REF!
Lepidoptera sp. 1 TS-2018	MG748599.1	15294	NA	NA	NA	41.2	11.8	39.2	7.8	#REF!	#REF!	#REF!

## Sheet: Ark3
Organism	Accession	Sequence Length	Clade	Superfamily	Family	T%	C%	A%	G%	A+T%	AT skew	GC skew
Manduca sexta	EU286785.1	15516	Ditrysia	Bombycoidea	Sphingidae	41.1	10.8	40.7	7.5	81.8	-0.00488998	-0.180328
Eriogyna pyretorum	FJ685653.1	15327	Ditrysia	Bombycoidea	Saturniidae	41.6	11.6	39.2	7.6	80.8	-0.029703	-0.208333
Actias selene	JX186589.1	15236	Ditrysia	Bombycoidea	Saturniidae	40.4	13	38.5	8.1	78.9	-0.0240811	-0.232227
Sphinx morio	KC470083.1	15299	Ditrysia	Bombycoidea	Sphingidae	40.5	11.3	40.6	7.6	81.1	0.00123305	-0.195767
Samia cynthia cynthia	KC812618.1	15345	Ditrysia	Bombycoidea	Saturniidae	40.3	12.3	39.6	7.8	79.9	-0.00876095	-0.223881
Attacus atlas	KF006326.1	15282	Ditrysia	Bombycoidea	Saturniidae	39.5	12.8	39.8	7.9	79.3	0.0037831	-0.236715
Actias artemis aliena	KF927042.1	15243	Ditrysia	Bombycoidea	Saturniidae	39.8	13.4	38.8	8	78.6	-0.0127226	-0.252336
Samia canningi	KJ159909.1	15384	Ditrysia	Bombycoidea	Saturniidae	40.2	12.3	39.6	7.8	79.8	-0.0075188	-0.223881
Bombyx huttoni	KP216766.1	15638	Ditrysia	Bombycoidea	Bombycidae	38	11.1	43.8	7.1	81.8	0.0709046	-0.21978
Ampelophaga rubiginosa	KT153024.1	15282	Ditrysia	Bombycoidea	Sphingidae	40.1	11	41.4	7.5	81.5	0.0159509	-0.189189
Rondotia menciana	KT258908.1	15636	Ditrysia	Bombycoidea	Bombycidae	40.2	10.6	42	7.2	82.2	0.0218978	-0.191011
Antheraea assamensis	KU379695.1	15272	Ditrysia	Bombycoidea	Saturniidae	40.8	12.1	39.4	7.7	80.2	-0.0174564	-0.222222
Dendrolimus spectabilis	KU558688.1	15409	Ditrysia	Bombycoidea	Lasiocampidae	38.6	12.6	40.8	8	79.4	0.0277078	-0.223301
Euthrix laeta	KU870700.1	15368	Ditrysia	Bombycoidea	Lasiocampidae	39.3	12	40.9	7.8	80.2	0.0199501	-0.212121
Trabala vishnou guttata	KU884483.1	15281	Ditrysia	Bombycoidea	Lasiocampidae	40.6	11.6	40.3	7.6	80.9	-0.00370828	-0.208333
Notonagemia analis scribae	KU934302.1	15303	Ditrysia	Bombycoidea	Sphingidae	39.1	12	41.1	7.8	80.2	0.0249377	-0.212121
Andraca theae	KX365419.1	15737	Ditrysia	Bombycoidea	Bombycidae	38	13.9	40.3	7.8	78.3	0.0293742	-0.281106
Kunugia undans	KX822016.1	15570	Ditrysia	Bombycoidea	Lasiocampidae	37.9	13.6	40.7	7.7	78.6	0.0356234	-0.276995
Triuncina daii	KY091643.1	15482	Ditrysia	Bombycoidea	Bombycidae	40.7	11.3	40.9	7.2	81.6	0.00245098	-0.221622
Cricula trifenestrata	KY644697.1	15425	Ditrysia	Bombycoidea	Saturniidae	38.4	14.2	39.3	8.1	77.7	0.011583	-0.273543
Saturnia boisduvalii	MF034742.1	15257	Ditrysia	Bombycoidea	Saturniidae	40.3	12.6	39	8.1	79.3	-0.0163934	-0.217391
Andraca olivacea	MF100135.1	15880	Ditrysia	Bombycoidea	Bombycidae	38.5	12.9	41.1	7.6	79.6	0.0326633	-0.258537
Comparmustilia sphingiformis	MF100137.1	15100	Ditrysia	Bombycoidea	Bombycidae	39	12.1	41.1	7.8	80.1	0.0262172	-0.21608
Dendrolimus kikuchii	MF100138.1	15382	Ditrysia	Bombycoidea	Lasiocampidae	37.8	13.4	40.9	7.9	78.7	0.0393901	-0.258216
Ernolatia moorei	MF100139.1	15377	Ditrysia	Bombycoidea	Bombycidae	39.7	11.8	41	7.4	80.7	0.016109	-0.229167
Ganisa cyanogrisea	MF100140.1	15250	Ditrysia	Bombycoidea	Eupterotidae	39.8	12.8	39.7	7.7	79.5	-0.00125786	-0.24878
Mustilizans hepatica	MF100141.1	15745	Ditrysia	Bombycoidea	Bombycidae	39.4	12	40.8	7.8	80.2	0.0174564	-0.212121
Mustilia undulosa	MF100142.1	15720	Ditrysia	Bombycoidea	Bombycidae	38.9	12.3	41.3	7.5	80.2	0.0299252	-0.242424
Oberthueria jiatongae	MF100143.1	15673	Ditrysia	Bombycoidea	Bombycidae	39.3	12.4	40.4	7.9	79.7	0.0138018	-0.221675
Ocinara albicollis	MF100144.1	15439	Ditrysia	Bombycoidea	Bombycidae	40.5	11.2	40.8	7.4	81.3	0.00369004	-0.204301
Prismosticta fenestrata	MF100145.1	15772	Ditrysia	Bombycoidea	Endromidae	39.9	11.2	41.2	7.6	81.1	0.0160296	-0.191489
Prismostictoides unihyala	MF100146.1	15355	Ditrysia	Bombycoidea	Endromidae	38.7	12.7	40.7	8	79.4	0.0251889	-0.227053
Rinaca jonasii	MF346379.1	15261	Ditrysia	Bombycoidea	Saturniidae	40.5	12.5	39	8.1	79.5	-0.0188679	-0.213592
Neoris haraldi	MF664471.1	15383	Ditrysia	Bombycoidea	Saturniidae	40.3	12.4	39.4	7.9	79.7	-0.0112923	-0.221675
Psilogramma increta	MF974243.1	15252	Ditrysia	Bombycoidea	Sphingidae	39.2	12	41.2	7.7	80.4	0.0248756	-0.218274
Brahmaea certhia	MG018026.1	15429	Ditrysia	Bombycoidea	Brahmaeidae	40.2	11.6	40.7	7.5	80.9	0.00618047	-0.21466
Samia ricini	MK050556.1	15388	Ditrysia	Bombycoidea	Saturniidae	40.2	12.3	39.7	7.8	79.9	-0.00625782	-0.223881
Bombyx mandarina	MK246424.1	15769	Ditrysia	Bombycoidea	Bombycidae	38.4	11.2	43	7.3	81.4	0.0565111	-0.210811
Bombyx mori	MK295812.1	15677	Ditrysia	Bombycoidea	Bombycidae	38.3	11.3	43.1	7.3	81.4	0.0589681	-0.215054
Antheraea pernyi x Antherea roylei	MK920216.1	15573	Ditrysia	Bombycoidea	Saturniidae	40.9	12.1	39.3	7.7	80.2	-0.0199501	-0.222222
Dendrolimus houi	MK952760.1	15443	Ditrysia	Bombycoidea	Lasiocampidae	38.8	12.5	41.2	7.6	80	0.03	-0.243781
Rotunda rotundapex	MN698791.1	15298	Ditrysia	Bombycoidea	Bombycidae	37.7	13.1	41.6	7.7	79.3	0.0491803	-0.259615
Rhodinia fugax	MT548575.1	15334	Ditrysia	Bombycoidea	Saturniidae	40.6	11.7	40	7.7	80.6	-0.00744417	-0.206186
Saturnia japonica	MT614593.1	15376	Ditrysia	Bombycoidea	Saturniidae	41.3	11.8	39.4	7.6	80.7	-0.023544	-0.216495
Antheraea pernyi	MT890592.1	15572	Ditrysia	Bombycoidea	Saturniidae	40.9	12	39.3	7.7	80.2	-0.0199501	-0.218274
Actias dubernardi	MW133617.1	15270	Ditrysia	Bombycoidea	Saturniidae	39.6	13.5	38.7	8.3	78.3	-0.0114943	-0.238532
Attacus atlas formosanus	MZ098706.1	15280	Ditrysia	Bombycoidea	Saturniidae	39.6	12.9	39.8	7.7	79.4	0.00251889	-0.252427
Rhodoprasina callantha	MZ343573.1	15343	Ditrysia	Bombycoidea	Sphingidae	39.1	11.7	41.7	7.5	80.8	0.0321782	-0.21875
Dahira obliquifascia	MZ343807.1	15939	Ditrysia	Bombycoidea	Sphingidae	39	12.4	41.3	7.3	80.3	0.0286426	-0.258883
Theretra alecto	MZ562563.1	15287	Ditrysia	Bombycoidea	Sphingidae	41.3	7.4	39.4	11.9	80.7	-0.023544	0.233161
Theretra clotho	MZ562564.1	15318	Ditrysia	Bombycoidea	Sphingidae	41	7.4	39.9	11.7	80.9	-0.013597	0.225131
Trabala vishnou	MZ927091.1	15282	Ditrysia	Bombycoidea	Lasiocampidae	40.6	11.7	40.1	7.6	80.7	-0.00619579	-0.212435
Bombyx lemeepauli	NC_037149.1	15801	Ditrysia	Bombycoidea	Bombycidae	37.5	11.9	43.2	7.4	80.7	0.070632	-0.233161
Macroglossum stellatarum	NC_037441.1	15290	Ditrysia	Bombycoidea	Sphingidae	40.5	11.2	40.7	7.6	81.2	0.00246305	-0.191489
Theretra oldenlandiae	NC_057303.1	15312	Ditrysia	Bombycoidea	Sphingidae	39.4	12.3	40.6	7.7	80	0.015	-0.23
Ambulyx liturata	NC_062106.1	15361	Ditrysia	Bombycoidea	Sphingidae	39.2	11.3	42	7.5	81.2	0.0344828	-0.202128
Polyptychus trilineatus	NC_062109.1	15289	Ditrysia	Bombycoidea	Sphingidae	39.9	11.3	41.1	7.7	81	0.0148148	-0.189474
Antheraea formosana	OK078922.1	15318	Ditrysia	Bombycoidea	Saturniidae	40.9	12	39.3	7.8	80.2	-0.0199501	-0.212121
Theretra japonica	OK149238.1	15393	Ditrysia	Bombycoidea	Sphingidae	39.2	12.3	41.2	7.4	80.4	0.0248756	-0.248731
Antheraea yamamai	OM214002.1	15340	Ditrysia	Bombycoidea	Saturniidae	41.1	12	39.3	7.7	80.4	-0.0223881	-0.218274
Pterodecta felderi	MT370823.1	15340	Ditrysia	Calliduloidea	Callidulidae	39.3	12.7	40	7.9	79.3	0.00882724	-0.23301
Carposina sasakii	HQ840719.1	15611	Ditrysia	Copromorphoidea	Carposinidae	39.5	10.7	42	7.8	81.5	0.0306748	-0.156757
Zeuzera multistrigata	MF491642.1	15260	Ditrysia	Cossoidea	Cossidae	39.2	13.1	39.7	7.9	78.9	0.00633714	-0.247619
Oreta fuscopurpurea	MG572766.1	15564	Ditrysia	Drepanoidea	Drepanidae	39.2	12.3	40.4	8.1	79.6	0.0150754	-0.205882
Epicopeia hainesii	MK033610.1	15395	Ditrysia	Drepanoidea	Epicopeiidae	39.6	11.8	41	7.6	80.6	0.0173697	-0.216495
Tethea albicostata	NC_061643.1	15308	Ditrysia	Drepanoidea	Drepanidae	40.3	11.6	40.3	7.9	80.6	0	-0.189744
Pectinophora gossypiella	KM225795.1	15202	Ditrysia	Gelechioidea	Gelechiidae	40.6	11.6	40.1	7.7	80.7	-0.00619579	-0.202073
Tecia solanivora	KT326187.1	15251	Ditrysia	Gelechioidea	Gelechiidae	39.6	13.3	38.6	8.4	78.2	-0.0127877	-0.225806
Helcystogramma macroscopa	KT354968.1	15394	Ditrysia	Gelechioidea	Gelechiidae	39.9	11.3	41	7.7	80.9	0.013597	-0.189474
Atrijuglans hetaohei	KT581634.1	15379	Ditrysia	Gelechioidea	Stathmopodidae	42.1	11.1	39.3	7.6	81.4	-0.034398	-0.187166
Hieromantis kurokoi	KU605775.1	15208	Ditrysia	Gelechioidea	Stathmopodidae	41.9	11.9	38.3	7.9	80.2	-0.0448878	-0.20202
Stathmopoda auriferella	KX138529.1	15456	Ditrysia	Gelechioidea	Oecophoridae	43.1	11.1	38.3	7.4	81.4	-0.0589681	-0.2
Scythris sinensis	MH230111.1	15216	Ditrysia	Gelechioidea	Scythrididae	42.2	11.4	38.7	7.7	80.9	-0.0432633	-0.193717
Coleophora therinella	MH473596.1	15539	Ditrysia	Gelechioidea	Coleophoridae	41.6	11.8	39.1	7.5	80.7	-0.0309789	-0.222798
Promalactis odaiensis	MK210633.1	15733	Ditrysia	Gelechioidea	Oecophoridae	41.9	12.9	37.5	7.7	79.4	-0.0554156	-0.252427
Opisina arenosella	MK467611.1	15389	Ditrysia	Gelechioidea	Oecophoridae	41.3	12	39.2	7.4	80.5	-0.026087	-0.237113
Tuta absoluta	MK654754.1	15290	Ditrysia	Gelechioidea	Gelechiidae	40.5	12	39.2	8.2	79.7	-0.0163112	-0.188119
Casmara patrona	MW006609.1	15393	Ditrysia	Gelechioidea	Oecophoridae	40.4	13.3	38.8	7.5	79.2	-0.020202	-0.278846
Meleonoma mirabilis	MW366996.1	15268	Ditrysia	Gelechioidea	Cosmopterigidae	40	14.8	37.1	8.2	77.1	-0.0376135	-0.286957
Ripeacma umbellata	MW366997.1	15486	Ditrysia	Gelechioidea	Oecophoridae	41.1	12.5	38.8	7.6	79.9	-0.028786	-0.243781
Phthorimaea operculella	MW540822.1	15269	Ditrysia	Gelechioidea	Gelechiidae	41	11.5	39.6	7.9	80.6	-0.0173697	-0.185567
Promalactis suzukiella	NC_026697.1	15507	Ditrysia	Gelechioidea	Oecophoridae	41.8	10.9	39.7	7.6	81.5	-0.0257669	-0.178378
Sitotroga cerealella	NC_041123.1	15312	Ditrysia	Gelechioidea	Gelechiidae	40.9	11.8	39.6	7.7	80.5	-0.0161491	-0.210256
Issikiopteryx taipingensis	ON323501.1	15234	Ditrysia	Gelechioidea	Lecithoceridae	41.5	12.4	38.4	7.7	79.9	-0.0387985	-0.233831
Monochroa sp.	ON323502.1	15299	Ditrysia	Gelechioidea	Gelechiidae	40.9	12.5	39	7.7	79.9	-0.0237797	-0.237624
Parachronistis sp.	ON323503.1	15212	Ditrysia	Gelechioidea	Gelechiidae	41.1	12	39	7.9	80.1	-0.0262172	-0.20603
Phthonandria atrilineata	EU569764.1	15499	Ditrysia	Geometroidea	Geometridae	40.2	11.3	40.8	7.7	81	0.00740741	-0.189474
Biston panterinaria	JX406146.1	15517	Ditrysia	Geometroidea	Geometridae	37.2	12.9	42.3	7.6	79.5	0.0641509	-0.258537
Biston thibetaria	KJ670146.1	15484	Ditrysia	Geometroidea	Geometridae	37.2	12.8	42.4	7.5	79.6	0.0653266	-0.261084
Biston suppressaria	KP278206.1	15628	Ditrysia	Geometroidea	Geometridae	37.5	12.8	41.9	7.8	79.4	0.0554156	-0.242718
Abraxas suspecta	KY095828.1	15537	Ditrysia	Geometroidea	Geometridae	39.6	11.4	41.3	7.7	80.9	0.0210136	-0.193717
Ectropis obliqua	MF417804.1	15475	Ditrysia	Geometroidea	Geometridae	40.2	11.2	40.7	7.8	80.9	0.00618047	-0.178947
Hypomecis punctinalis	MH311778.1	15629	Ditrysia	Geometroidea	Geometridae	38.7	12.3	41.1	7.9	79.8	0.0300752	-0.217822
Iotaphora admirabilis	MK903032.1	16140	Ditrysia	Geometroidea	Geometridae	39.8	10.3	42.5	7.4	82.3	0.0328068	-0.163842
Erannis ankeraria	MN046105.1	15250	Ditrysia	Geometroidea	Geometridae	38	12.3	41.3	8.4	79.3	0.0416141	-0.188406
Acropteris iphiata	MN093120.1	15346	Ditrysia	Geometroidea	Uraniidae	37.9	11.5	43.1	7.5	81	0.0641975	-0.210526
Milionia basalis	MN495623.1	15901	Ditrysia	Geometroidea	Geometridae	40.6	10.5	41.6	7.3	82.2	0.0121655	-0.179775
Pasiphila chloerata	MN598218.1	15602	Ditrysia	Geometroidea	Geometridae	40.5	11.6	40.1	7.8	80.6	-0.00496278	-0.195876
Idaea effusaria	MN646772.1	16161	Ditrysia	Geometroidea	Geometridae	41	10.7	41.1	7.2	82.1	0.00121803	-0.195531
Idaea simplicior	MN715151.1	15950	Ditrysia	Geometroidea	Geometridae	41.1	10.7	40.9	7.3	82	-0.00243902	-0.188889
Biston thoracicaria	MN956510.1	15538	Ditrysia	Geometroidea	Geometridae	39	11.4	42	7.6	81	0.037037	-0.2
Hydrelia parvulata	MN962739.1	15407	Ditrysia	Geometroidea	Geometridae	40.4	11.6	39.8	8.2	80.2	-0.0074813	-0.171717
Ectropis grisescens	MW337302.1	15794	Ditrysia	Geometroidea	Geometridae	39.5	11.3	41.3	7.9	80.8	0.0222772	-0.177083
Lyssa zampa	MZ713634.1	15571	Ditrysia	Geometroidea	Uraniidae	40.2	11	41.6	7.3	81.8	0.0171149	-0.202186
Amraica recursaria	MZ713635.1	15609	Ditrysia	Geometroidea	Geometridae	39.8	11	41.6	7.6	81.4	0.022113	-0.182796
Cleora fraterna	MZ779035.1	15513	Ditrysia	Geometroidea	Geometridae	38.7	12.2	41	8.1	79.7	0.0288582	-0.20197
Tanaorhinus viridiluteata	MZ927090.1	16397	Ditrysia	Geometroidea	Geometridae	38.9	10.9	42.8	7.4	81.7	0.0477356	-0.191257
Operophtera brumata	NC_027723.1	15748	Ditrysia	Geometroidea	Geometridae	39.8	12.1	40.2	7.9	80	0.005	-0.21
Biston regalis	NC_061644.1	15532	Ditrysia	Geometroidea	Geometridae	39	11.8	41.7	7.5	80.7	0.0334572	-0.222798
Chorodna fulgurita	NC_062108.1	15719	Ditrysia	Geometroidea	Geometridae	39.6	10.8	41.9	7.7	81.5	0.0282209	-0.167568
Ophthalmitis albosignaria	OK235308.1	15569	Ditrysia	Geometroidea	Geometridae	39.6	11.1	41.8	7.5	81.4	0.027027	-0.193548
Macrosoma conifera	NC_050856.1	15344	Ditrysia	Hedyloidea	Hedylidae	41.2	10.9	40.5	7.5	81.7	-0.00856793	-0.184783
Pyrgus malvae	BK013352.1	15380	Ditrysia	Hesperioidea	Hesperiidae	41.2	10.9	40.5	7.4	81.7	-0.00856793	-0.191257
Ochlodes venata	HM243593.1	15622	Ditrysia	Hesperioidea	Hesperiidae	41.4	10.7	40.6	7.4	82	-0.0097561	-0.18232
Ctenoptilum vasava	JF713818.1	15468	Ditrysia	Hesperioidea	Hesperiidae	41.5	11.7	39.1	7.7	80.6	-0.0297767	-0.206186
Parnara guttata	JX101619.1	15441	Ditrysia	Hesperioidea	Hesperiidae	40.7	11.8	39.9	7.6	80.6	-0.00992556	-0.216495
Choaspes benjaminii	JX101620.1	15272	Ditrysia	Hesperioidea	Hesperiidae	40.7	11.7	40.1	7.5	80.8	-0.00742574	-0.21875
Erynnis montanus	KC659955.1	15530	Ditrysia	Hesperioidea	Hesperiidae	40.9	10.8	40.8	7.5	81.7	-0.00122399	-0.180328
Daimio tethys	KJ813807.1	15341	Ditrysia	Hesperioidea	Hesperiidae	39.7	13	39.5	7.9	79.2	-0.00252525	-0.244019
Ampittia dioscorides	KM102732.1	15313	Ditrysia	Hesperioidea	Hesperiidae	40	12	40.1	7.9	80.1	0.00124844	-0.20603
Hasora anura	KR189008.1	15290	Ditrysia	Hesperioidea	Hesperiidae	39.7	12.5	39.8	8	79.5	0.00125786	-0.219512
Lerema accius	KT598278.1	15338	Ditrysia	Hesperioidea	Hesperiidae	41.3	11.6	39.5	7.6	80.8	-0.0222772	-0.208333
Tagiades vajuna	KX865091.1	15359	Ditrysia	Hesperioidea	Hesperiidae	40.7	12.4	39	7.9	79.7	-0.02133	-0.221675
Hasora badra	MK238674.1	15324	Ditrysia	Hesperioidea	Hesperiidae	40.1	12.5	39.6	7.8	79.7	-0.00627353	-0.231527
Hasora vitta	MK238675.1	15290	Ditrysia	Hesperioidea	Hesperiidae	40.4	12.2	39.6	7.8	80	-0.01	-0.22
Leptalina unicolor	MK265705.1	15854	Ditrysia	Hesperioidea	Hesperiidae	40	11.4	41.3	7.4	81.3	0.0159902	-0.212766
Hasora chromus	MN182753.1	15413	Ditrysia	Hesperioidea	Hesperiidae	40.1	12.4	39.5	7.9	79.6	-0.00753769	-0.221675
Abraximorpha davidii	MT371044.1	15469	Ditrysia	Hesperioidea	Hesperiidae	41.4	11.2	40.2	7.3	81.6	-0.0147059	-0.210811
Pelopidas mathias	MW264491.1	15524	Ditrysia	Hesperioidea	Hesperiidae	40.8	11.6	40.1	7.5	80.9	-0.00865266	-0.21466
Erionota torus	MW586888.1	15987	Ditrysia	Hesperioidea	Hesperiidae	41.5	11.5	39.7	7.3	81.2	-0.0221675	-0.223404
Celaenorrhinus maculosa	NC_022853.1	15282	Ditrysia	Hesperioidea	Hesperiidae	39.9	12.4	40	7.7	79.9	0.00125156	-0.233831
Heteropterus morpheus	NC_028506.1	15769	Ditrysia	Hesperioidea	Hesperiidae	40.7	11.1	40.7	7.6	81.4	0	-0.187166
Ochrogaster lunifer	AM946601.1	15593	Ditrysia	Noctuoidea	Notodontidae	37.7	14.6	40.1	7.6	77.8	0.0308483	-0.315315
Lymantria dispar	FJ617240.1	15569	Ditrysia	Noctuoidea	Erebidae	39.3	12.6	40.6	7.6	79.9	0.0162703	-0.247525
Helicoverpa armigera	GU188273.1	15347	Ditrysia	Noctuoidea	Noctuidae	40.4	11.3	40.5	7.7	80.9	0.00123609	-0.189474
Hyphantria cunea	GU592049.1	15481	Ditrysia	Noctuoidea	Erebidae	39.8	12.1	40.6	7.6	80.4	0.00995025	-0.228426
Phalera flavescens	JF440342.1	15659	Ditrysia	Noctuoidea	Notodontidae	40.8	11.3	40.1	7.9	80.9	-0.00865266	-0.177083
Spodoptera exigua	JX316220.1	15365	Ditrysia	Noctuoidea	Noctuidae	40.1	11.4	40.9	7.7	81	0.00987654	-0.193717
Gynaephora menyuanensis	KC185412.1	15770	Ditrysia	Noctuoidea	Erebidae	40.6	11.8	40.9	6.8	81.5	0.00368098	-0.268817
Asota plana lacteata	KJ173908.1	15416	Ditrysia	Noctuoidea	Erebidae	40.3	12.2	40.1	7.5	80.4	-0.00248756	-0.238579
Eutelia adulatricoides	KJ185131.1	15360	Ditrysia	Noctuoidea	Euteliidae	40.7	11.3	40.2	7.8	80.9	-0.00618047	-0.183246
Vamuna virilis	KJ364659.1	15417	Ditrysia	Noctuoidea	Erebidae	40.2	12.1	40.2	7.6	80.4	0	-0.228426
Gabala argentata	KJ410747.1	15337	Ditrysia	Noctuoidea	Nolidae	42	10.7	39.6	7.6	81.6	-0.0294118	-0.169399
Catocala sp. XY-2014	KJ432280.1	15671	Ditrysia	Noctuoidea	Erebidae	41.4	11.6	39.7	7.3	81.1	-0.0209618	-0.227513
Euproctis pseudoconspersa	KJ716847.1	15461	Ditrysia	Noctuoidea	Erebidae	39.5	12.5	40.4	7.6	79.9	0.0112641	-0.243781
Helicoverpa zea	KJ930516.1	15343	Ditrysia	Noctuoidea	Noctuidae	40.4	11.4	40.6	7.6	81	0.00246914	-0.2
Mythimna separata	KM099034.1	15329	Ditrysia	Noctuoidea	Noctuidae	41	11.3	40	7.7	81	-0.0123457	-0.189474
Striacosta albicosta	KM488268.1	15553	Ditrysia	Noctuoidea	Noctuidae	39.2	12.8	40.1	7.9	79.3	0.0113493	-0.236715
Lemyra melli	KP307017.1	15418	Ditrysia	Noctuoidea	Erebidae	39.3	13.1	39.4	8.3	78.7	0.00127065	-0.224299
Callimorpha dominula	KP973953.1	15496	Ditrysia	Noctuoidea	Erebidae	40.9	11.4	40.1	7.6	81	-0.00987654	-0.2
Spilarctia subcarnea	KT258909.1	15441	Ditrysia	Noctuoidea	Erebidae	39.8	12.3	40	8	79.8	0.00250627	-0.211823
Euproctis similis	KT258910.1	15437	Ditrysia	Noctuoidea	Erebidae	40.1	12.3	40.1	7.5	80.2	0	-0.242424
Clostera anachoreta	KX108766.1	15456	Ditrysia	Noctuoidea	Notodontidae	41.1	11.7	39.6	7.6	80.7	-0.0185874	-0.212435
Spilarctia alba	KX753670.1	15447	Ditrysia	Noctuoidea	Erebidae	41.1	11.4	39.8	7.6	80.9	-0.0160692	-0.2
Eudocima phalonia	KY196412.1	15575	Ditrysia	Noctuoidea	Erebidae	40.8	11.8	39.8	7.5	80.6	-0.0124069	-0.222798
Protegira songi	KY379907.1	15410	Ditrysia	Noctuoidea	Noctuidae	40.1	11.9	40.1	7.9	80.2	0	-0.20202
Grammodes geometrica	KY888135.1	15728	Ditrysia	Noctuoidea	Erebidae	40.4	11.9	40.1	7.6	80.5	-0.00372671	-0.220513
Euproctis cryptosticta	KY996558.1	15462	Ditrysia	Noctuoidea	Erebidae	39.5	12.5	40.4	7.6	79.9	0.0112641	-0.243781
Athetis lepigone	MF152835.1	15589	Ditrysia	Noctuoidea	Noctuidae	41.6	11.1	39.7	7.6	81.3	-0.0233702	-0.187166
Sinna extrema	MG872330.1	15345	Ditrysia	Noctuoidea	Nolidae	40.7	11.4	40.1	7.8	80.8	-0.00742574	-0.1875
Mythimna pallidicosta	MH027985.1	15320	Ditrysia	Noctuoidea	Noctuidae	40.3	11.9	39.9	7.8	80.2	-0.00498753	-0.208122
Somena scintillans	MH051839.1	15410	Ditrysia	Noctuoidea	Erebidae	40.8	12	40.1	7.2	80.9	-0.00865266	-0.25
Clostera anastomosis	MH286069.1	15390	Ditrysia	Noctuoidea	Notodontidae	40.4	12.2	39.7	7.8	80.1	-0.00873908	-0.22
Thaumetopoea pityocampa	MH286070.1	15737	Ditrysia	Noctuoidea	Notodontidae	37.3	14.6	40.5	7.6	77.8	0.0411311	-0.315315
Spilosoma lubricipeda	MH311776.1	15375	Ditrysia	Noctuoidea	Erebidae	41.3	11.3	40.1	7.3	81.4	-0.014742	-0.215054
Lymantria mathura	MH388824.2	15506	Ditrysia	Noctuoidea	Erebidae	40.4	7.6	37.5	14.4	77.9	-0.0372272	0.309091
Trichoplusia ni	MK358044.1	15257	Ditrysia	Noctuoidea	Noctuidae	41.6	11.5	38.9	8	80.5	-0.0335404	-0.179487
Spodoptera frugiperda	MN094786.1	15353	Ditrysia	Noctuoidea	Noctuidae	42.2	10.9	39.4	7.6	81.6	-0.0343137	-0.178378
Eilema ussuricum	MN696172.1	15344	Ditrysia	Noctuoidea	Erebidae	40.3	12	40.2	7.6	80.5	-0.00124224	-0.22449
Catocala electa	MN698265.1	15575	Ditrysia	Noctuoidea	Erebidae	41.7	11.4	39.6	7.3	81.3	-0.0258303	-0.219251
Anarta trifolii	MN715147.1	15281	Ditrysia	Noctuoidea	Noctuidae	41.3	10.7	40.2	7.7	81.5	-0.0134969	-0.163043
Laelia suffusa	MN908152.1	15502	Ditrysia	Noctuoidea	Erebidae	40.1	7.4	38.9	13.6	79	-0.0151899	0.295238
Euproctis seitzi	MN916588.1	15276	Ditrysia	Noctuoidea	Erebidae	41.9	11.5	39.5	7.1	81.4	-0.029484	-0.236559
Spirama retorta	MT013356.1	15652	Ditrysia	Noctuoidea	Erebidae	41.2	11.8	39.6	7.4	80.8	-0.019802	-0.229167
Lacanobia aliena	MT040605.1	15400	Ditrysia	Noctuoidea	Noctuidae	39.1	11.7	41.5	7.6	80.6	0.0297767	-0.212435
Spodoptera littoralis	MT816470.1	15408	Ditrysia	Noctuoidea	Noctuidae	40	11.3	41	7.6	81	0.0123457	-0.195767
Spodoptera exempta	MT906792.1	15457	Ditrysia	Noctuoidea	Noctuidae	40.7	10.7	40.9	7.6	81.6	0.00245098	-0.169399
Diachrysia nadeja	MT916722.1	15242	Ditrysia	Noctuoidea	Noctuidae	41.4	11.6	39.1	7.9	80.5	-0.0285714	-0.189744
Leucoma chrysoscela	MW030505.1	15508	Ditrysia	Noctuoidea	Erebidae	40.6	11.7	40.2	7.4	80.8	-0.0049505	-0.225131
Orgyia postica	MW355619.1	15258	Ditrysia	Noctuoidea	Erebidae	39.7	7.9	37.5	14.8	77.2	-0.0284974	0.303965
Arctia plantaginis	MW394229.1	15479	Ditrysia	Noctuoidea	Erebidae	41	11.8	39.7	7.4	80.7	-0.016109	-0.229167
Periacma orthiodes	MW697075.1	15306	Ditrysia	Noctuoidea	Noctuidae	42.6	11.8	37.8	7.7	80.4	-0.0597015	-0.210256
Agrotis munda	MZ397914.1	15402	Ditrysia	Noctuoidea	Noctuidae	41.1	11.1	40.1	7.6	81.2	-0.0123153	-0.187166
Nyctemera adversata	MZ562560.1	15429	Ditrysia	Noctuoidea	Erebidae	39.6	13.2	39.6	7.6	79.2	0	-0.269231
Thyas honesta	MZ562561.1	15582	Ditrysia	Noctuoidea	Erebidae	42.3	10.7	39.6	7.3	81.9	-0.032967	-0.188889
Arcte coerula	MZ562562.1	15265	Ditrysia	Noctuoidea	Erebidae	39.7	13	39.2	8.1	78.9	-0.00633714	-0.232227
Acronicta major	MZ562565.1	15401	Ditrysia	Noctuoidea	Noctuidae	38.2	13.1	40.8	8	79	0.0329114	-0.241706
Condica illecta	MZ562566.1	15364	Ditrysia	Noctuoidea	Noctuidae	40.9	11.3	40.1	7.7	81	-0.00987654	-0.189474
Calliteara horishanella	MZ571364.1	15467	Ditrysia	Noctuoidea	Erebidae	39	12.9	40.5	7.6	79.5	0.0188679	-0.258537
Xanthodes intersepta	MZ571408.1	15366	Ditrysia	Noctuoidea	Noctuidae	41.3	10.7	40.3	7.7	81.6	-0.0122549	-0.163043
Athetis thoracica	MZ571409.1	15364	Ditrysia	Noctuoidea	Noctuidae	41.8	11	39.5	7.6	81.3	-0.0282903	-0.182796
Condica capensis	MZ571410.1	15312	Ditrysia	Noctuoidea	Noctuidae	40.7	11.2	40.2	7.8	80.9	-0.00618047	-0.178947
Risoba prominens	MZ618262.1	15345	Ditrysia	Noctuoidea	Nolidae	40.8	11.1	40.3	7.8	81.1	-0.00616523	-0.174603
Spodoptera litura	MZ618263.1	15382	Ditrysia	Noctuoidea	Noctuidae	40	11.3	41	7.6	81	0.0123457	-0.195767
Helicoverpa assulta	MZ618264.1	15410	Ditrysia	Noctuoidea	Noctuidae	40.7	11.4	40.3	7.6	81	-0.00493827	-0.2
Asota caricae	MZ779033.1	15409	Ditrysia	Noctuoidea	Erebidae	40.3	12.2	40	7.5	80.3	-0.00373599	-0.238579
Actebia praecox	MZ853167.1	15382	Ditrysia	Noctuoidea	Noctuidae	40.7	11.5	40.1	7.7	80.8	-0.00742574	-0.197917
Mythimna loreyi	MZ853169.1	15312	Ditrysia	Noctuoidea	Noctuidae	41.1	11.4	39.8	7.6	80.9	-0.0160692	-0.2
Amerila alberti	MZ927092.1	15503	Ditrysia	Noctuoidea	Erebidae	40.5	11.8	40.1	7.6	80.6	-0.00496278	-0.216495
Asota plana	MZ927093.1	15421	Ditrysia	Noctuoidea	Erebidae	40.2	12.2	40.1	7.5	80.3	-0.00124533	-0.238579
Calyptra minuticornis	MZ944874.1	15931	Ditrysia	Noctuoidea	Erebidae	41.3	10.9	40.6	7.2	81.9	-0.00854701	-0.20442
Artena dotata	MZ944875.1	15629	Ditrysia	Noctuoidea	Erebidae	41.2	11.9	39.5	7.4	80.7	-0.0210657	-0.233161
Asota paliura	MZ944876.1	15399	Ditrysia	Noctuoidea	Erebidae	40.2	12.3	40	7.6	80.2	-0.00249377	-0.236181
Spilarctia casigneta	MZ959068.1	15402	Ditrysia	Noctuoidea	Erebidae	40.2	12.2	40.2	7.4	80.4	0	-0.244898
Daddala lucilla	MZ959069.1	15643	Ditrysia	Noctuoidea	Erebidae	41.3	11.7	39.5	7.5	80.8	-0.0222772	-0.21875
Agrotis ipsilon	MZ959071.1	15379	Ditrysia	Noctuoidea	Noctuidae	40.8	11.1	40.4	7.7	81.2	-0.00492611	-0.180851
Parallelia stuposa	MZ959072.1	15682	Ditrysia	Noctuoidea	Erebidae	40.5	12.1	39.9	7.5	80.4	-0.00746269	-0.234694
Chilkasa falcata	MZ959073.1	15603	Ditrysia	Noctuoidea	Erebidae	41.4	11.5	39.6	7.5	81	-0.0222222	-0.210526
Erebus caprimulgus	MZ964411.1	15963	Ditrysia	Noctuoidea	Erebidae	41.9	11.6	39.2	7.3	81.1	-0.0332922	-0.227513
Pareuchaetes insulata	MZ964412.1	15299	Ditrysia	Noctuoidea	Erebidae	41.3	11.8	39.3	7.6	80.6	-0.0248139	-0.216495
Chrysopera combinans	MZ964413.1	15815	Ditrysia	Noctuoidea	Erebidae	41	11.3	40.2	7.5	81.2	-0.00985222	-0.202128
Tiracola plagiata	MZ964414.1	15377	Ditrysia	Noctuoidea	Noctuidae	40.4	12	39.5	8	79.9	-0.0112641	-0.2
Sesamia inferens	NC_015835.1	15413	Ditrysia	Noctuoidea	Noctuidae	40.2	12.2	40.1	7.6	80.3	-0.00124533	-0.232323
Helicoverpa punctigera	NC_023791.1	15382	Ditrysia	Noctuoidea	Noctuidae	40.7	11.1	40.7	7.6	81.4	0	-0.187166
Hydrillodes lentalis	NC_041106.1	15570	Ditrysia	Noctuoidea	Erebidae	41.4	11.4	39.7	7.5	81.1	-0.0209618	-0.206349
Athetis pallidipennis	NC_046525.1	15344	Ditrysia	Noctuoidea	Noctuidae	41.5	11.3	39.5	7.7	81	-0.0246914	-0.189474
Ctenoplusia albostriata	NC_053742.1	15284	Ditrysia	Noctuoidea	Noctuidae	41.3	11.3	39.6	7.8	80.9	-0.0210136	-0.183246
Spodoptera depravata	NC_061562.1	15460	Ditrysia	Noctuoidea	Noctuidae	40.6	10.8	41	7.6	81.6	0.00490196	-0.173913
Simplicia rectalis	NC_061563.1	15546	Ditrysia	Noctuoidea	Erebidae	41.1	11.5	40	7.4	81.1	-0.0135635	-0.216931
Imosca coreana	NC_061564.1	15417	Ditrysia	Noctuoidea	Noctuidae	39.8	11.8	40.7	7.7	80.5	0.0111801	-0.210256
Pyrrhia umbra	NC_061565.1	15370	Ditrysia	Noctuoidea	Noctuidae	40.3	11.3	40.6	7.8	80.9	0.00370828	-0.183246
Sphragifera sigillata	NC_061640.1	15368	Ditrysia	Noctuoidea	Noctuidae	41.3	10.8	40.2	7.6	81.5	-0.0134969	-0.173913
Mocis ancilla	NC_061641.1	15726	Ditrysia	Noctuoidea	Erebidae	41.1	11.6	40	7.3	81.1	-0.0135635	-0.227513
Pheosia rimosa	NC_061645.1	15510	Ditrysia	Noctuoidea	Notodontidae	38.9	12.7	40.6	7.8	79.5	0.0213836	-0.239024
Mamestra brassicae	NC_061705.1	15342	Ditrysia	Noctuoidea	Noctuidae	40.8	11.1	40.4	7.7	81.2	-0.00492611	-0.180851
Olene inclusa	NC_062102.1	15486	Ditrysia	Noctuoidea	Erebidae	40.2	12.4	39.8	7.7	80	-0.005	-0.233831
Tiracola aureata	NC_062103.1	15384	Ditrysia	Noctuoidea	Noctuidae	40.8	11.9	39.4	7.9	80.2	-0.0174564	-0.20202
Eligma narcissus	NC_062104.1	15346	Ditrysia	Noctuoidea	Nolidae	40	11.5	40.9	7.7	80.9	0.0111248	-0.197917
Anomis mesogona	NC_062105.1	15626	Ditrysia	Noctuoidea	Erebidae	40.7	11.3	40.4	7.6	81.1	-0.00369914	-0.195767
Actinotia intermediata	NC_062107.1	15352	Ditrysia	Noctuoidea	Noctuidae	41	10.9	40.5	7.7	81.5	-0.00613497	-0.172043
Eucarta virgo	NC_062110.1	15435	Ditrysia	Noctuoidea	Noctuidae	42.1	10.4	40	7.6	82.1	-0.0255786	-0.155556
Peridea elzet	NC_062111.1	15210	Ditrysia	Noctuoidea	Notodontidae	39.9	11.8	40.4	7.9	80.3	0.00622665	-0.19797
Cosmia restituta	NC_062112.1	15408	Ditrysia	Noctuoidea	Noctuidae	40.3	12	39.7	8	80	-0.0075	-0.2
Melanchra persicariae	NC_062113.1	15355	Ditrysia	Noctuoidea	Noctuidae	41.1	11.1	40.2	7.5	81.3	-0.0110701	-0.193548
Simplicia niphona	NC_062114.1	15552	Ditrysia	Noctuoidea	Erebidae	41.1	11.5	40	7.4	81.1	-0.0135635	-0.216931
Agrotis trifurca	NC_062115.1	15390	Ditrysia	Noctuoidea	Noctuidae	40.2	11.6	40.4	7.7	80.6	0.00248139	-0.202073
Earias clorana	NC_062116.1	15561	Ditrysia	Noctuoidea	Nolidae	41.7	11.1	39.7	7.5	81.4	-0.02457	-0.193548
Acronicta rumicis	NC_062117.1	15388	Ditrysia	Noctuoidea	Noctuidae	40.3	11.7	40.4	7.7	80.7	0.00123916	-0.206186
Niphonyx segregata	NC_062119.1	15322	Ditrysia	Noctuoidea	Noctuidae	40.1	11.9	40.3	7.7	80.4	0.00248756	-0.214286
Abrostola triplasia	NC_062120.1	15363	Ditrysia	Noctuoidea	Noctuidae	40.8	11.5	39.9	7.7	80.7	-0.0111524	-0.197917
Syntypistis chambae	NC_062123.1	15938	Ditrysia	Noctuoidea	Notodontidae	39.4	11.3	41.9	7.4	81.3	0.0307503	-0.208556
Cucullia pustulata	NC_062181.1	15378	Ditrysia	Noctuoidea	Noctuidae	41	11.1	40.6	7.4	81.6	-0.00490196	-0.2
Phragmatobia fuliginosa	NC_062183.1	15469	Ditrysia	Noctuoidea	Erebidae	40.8	11.6	40.2	7.4	81	-0.00740741	-0.221053
Pseudoips prasinana	NC_062184.1	15239	Ditrysia	Noctuoidea	Nolidae	41.3	11.3	39.4	7.9	80.7	-0.023544	-0.177083
Leucoma salicis	NC_063089.1	15334	Ditrysia	Noctuoidea	Erebidae	38.5	12.2	42.1	7.2	80.6	0.044665	-0.257732
Neocerura liturata	OK094456.1	15427	Ditrysia	Noctuoidea	Notodontidae	38.6	12.5	41.4	7.4	80	0.035	-0.256281
Sasakia charonda kuriyamaensis	AP011825.1	15222	Ditrysia	Papilionoidea	Nymphalidae	40.2	12.2	39.7	7.9	79.9	-0.00625782	-0.21393
Coreana raphaelis	DQ102703.1	15314	Ditrysia	Papilionoidea	Lycaenidae	43.3	10	39.4	7.3	82.7	-0.0471584	-0.156069
Papilio maraho	FJ810212.1	16094	Ditrysia	Papilionoidea	Papilionidae	40	12.3	40.5	7.2	80.5	0.00621118	-0.261538
Telchinia issoria	GQ376195.1	15245	Ditrysia	Papilionoidea	Nymphalidae	40.8	12.5	38.9	7.7	79.7	-0.0238394	-0.237624
Pieris rapae	GQ398376.1	15164	Ditrysia	Papilionoidea	Pieridae	39.3	12.5	40.4	7.8	79.7	0.0138018	-0.231527
Melitaea cinxia	GQ398377.1	15170	Ditrysia	Papilionoidea	Nymphalidae	39.7	12.4	40.3	7.5	80	0.0075	-0.246231
Parnassius bremeri	HM243588.1	15390	Ditrysia	Papilionoidea	Papilionidae	41.3	11.3	39.8	7.6	81.1	-0.0184957	-0.195767
Cigaritis takanonis	HQ184266.1	15349	Ditrysia	Papilionoidea	Lycaenidae	41	10.7	41.3	6.9	82.3	0.0036452	-0.215909
Abisara fylloides	HQ259069.1	15301	Ditrysia	Papilionoidea	Riodinidae	41.7	11.3	39.5	7.5	81.2	-0.0270936	-0.202128
Sericinus montela	HQ259122.1	15242	Ditrysia	Papilionoidea	Papilionidae	40.8	11.6	40.1	7.4	80.9	-0.00865266	-0.221053
Calinaga davidis	HQ658143.1	15267	Ditrysia	Papilionoidea	Nymphalidae	42	11.7	38.4	7.8	80.4	-0.0447761	-0.2
Argynnis hyperbius	JF439070.1	15156	Ditrysia	Papilionoidea	Nymphalidae	41.4	11.7	39.4	7.5	80.8	-0.0247525	-0.21875
Fabriciana nerippe	JF504707.1	15140	Ditrysia	Papilionoidea	Nymphalidae	41.5	11.6	39.4	7.5	80.9	-0.025958	-0.21466
Apatura metis	JF801742.1	15236	Ditrysia	Papilionoidea	Nymphalidae	40.7	11.8	39.8	7.7	80.5	-0.0111801	-0.210256
Melanitis leda	JF905446.1	15122	Ditrysia	Papilionoidea	Nymphalidae	41.4	12.5	38.4	7.7	79.8	-0.037594	-0.237624
Papilio bianor	JN019809.1	15340	Ditrysia	Papilionoidea	Papilionidae	40.9	11.8	39.7	7.7	80.6	-0.0148883	-0.210256
Kallima inachus	JN857943.1	15183	Ditrysia	Papilionoidea	Nymphalidae	40.7	11.9	39.6	7.8	80.3	-0.0136986	-0.208122
Athyma sulpitia	JQ347260.1	15268	Ditrysia	Papilionoidea	Nymphalidae	42.9	10.6	39	7.4	81.9	-0.047619	-0.177778
Sasakia funebris	JX131328.1	15233	Ditrysia	Papilionoidea	Nymphalidae	41.3	11.2	39.9	7.6	81.2	-0.0172414	-0.191489
Cupido argiades	KC310728.1	15330	Ditrysia	Papilionoidea	Lycaenidae	41.4	10.6	40.4	7.6	81.8	-0.0122249	-0.164835
Hebomoia glaucippe	KC489093.1	15701	Ditrysia	Papilionoidea	Pieridae	41.4	12.2	38.5	7.9	79.9	-0.0362954	-0.21393
Timelaea maculata	KC572131.1	15178	Ditrysia	Papilionoidea	Nymphalidae	42	11.3	39.1	7.6	81.1	-0.0357583	-0.195767
Danaus plexippus	KC836923.1	15314	Ditrysia	Papilionoidea	Nymphalidae	42.6	11.2	38.7	7.4	81.3	-0.0479705	-0.204301
Luehdorfia taibai	KC952673.1	15553	Ditrysia	Papilionoidea	Papilionidae	41.1	11.1	40.4	7.4	81.5	-0.00858896	-0.2
Junonia orithya	KF199862.1	15214	Ditrysia	Papilionoidea	Nymphalidae	40.9	11.6	39.5	8	80.4	-0.0174129	-0.183673
Danaus chrysippus	KF690637.1	15236	Ditrysia	Papilionoidea	Nymphalidae	41.4	12.1	38.9	7.5	80.3	-0.0311333	-0.234694
Parnassius apollo	KF746065.1	15404	Ditrysia	Papilionoidea	Papilionidae	41.3	11.1	40	7.6	81.3	-0.0159902	-0.187166
Davidina armandi	KF881046.1	15214	Ditrysia	Papilionoidea	Nymphalidae	40.7	12.6	39	7.7	79.7	-0.02133	-0.241379
Eurema hecabe	KF881047.1	15112	Ditrysia	Papilionoidea	Pieridae	41.4	11.9	39.2	7.5	80.6	-0.0272953	-0.226804
Gonepteryx mahaguru	KF881048.1	15221	Ditrysia	Papilionoidea	Pieridae	41.8	11.5	39.1	7.7	80.9	-0.0333745	-0.197917
Ninguta schrenckii	KF881052.1	15261	Ditrysia	Papilionoidea	Nymphalidae	42.2	12.2	38	7.7	80.2	-0.0523691	-0.226131
Callerebia suroia	KF906483.1	15208	Ditrysia	Papilionoidea	Nymphalidae	41.4	12.5	38.1	8	79.5	-0.0415094	-0.219512
Elymnias hypermnestra	KF906484.1	15167	Ditrysia	Papilionoidea	Nymphalidae	42	11.7	38.5	7.8	80.5	-0.0434783	-0.2
Lethe dura	KF906485.1	15259	Ditrysia	Papilionoidea	Nymphalidae	41	12.9	38.2	7.9	79.2	-0.0353535	-0.240385
Melanargia asiatica	KF906486.1	15142	Ditrysia	Papilionoidea	Nymphalidae	40.9	13	38.1	8	79	-0.035443	-0.238095
Triphysa phryne	KF906487.1	15143	Ditrysia	Papilionoidea	Nymphalidae	40.8	12.8	38	8.4	78.8	-0.035533	-0.207547
Lamproptera curius	KJ141168.1	15277	Ditrysia	Papilionoidea	Papilionidae	40.6	11.7	39.9	7.9	80.5	-0.00869565	-0.193878
Papilio syfanius	KJ396621.1	15359	Ditrysia	Papilionoidea	Papilionidae	41.1	11.7	39.5	7.7	80.6	-0.0198511	-0.206186
Graphium mullah	KJ472924.1	15226	Ditrysia	Papilionoidea	Papilionidae	40.5	11.7	39.8	7.9	80.3	-0.00871731	-0.193878
Ideopsis similis	KJ476729.1	15200	Ditrysia	Papilionoidea	Nymphalidae	42.5	11.2	39.1	7.3	81.6	-0.0416667	-0.210811
Atrophaneura alcinous	KJ540880.1	15266	Ditrysia	Papilionoidea	Papilionidae	42.5	11.5	38.6	7.4	81.1	-0.0480888	-0.216931
Pararge aegeria aegeria	KJ547676.1	15240	Ditrysia	Papilionoidea	Nymphalidae	41.6	11.8	38.9	7.7	80.5	-0.0335404	-0.210256
Apodemia mormo	KJ647171.1	15262	Ditrysia	Papilionoidea	Riodinidae	42.7	11	38.9	7.5	81.6	-0.0465686	-0.189189
Euploea midamus	KJ866207.1	15187	Ditrysia	Papilionoidea	Nymphalidae	41.9	11.6	39	7.5	80.9	-0.0358467	-0.21466
Heliconius pachinus	KM014809.1	15369	Ditrysia	Papilionoidea	Nymphalidae	42	11.1	39.2	7.7	81.2	-0.0344828	-0.180851
Heliconius hecale	KM068091.1	15338	Ditrysia	Papilionoidea	Nymphalidae	42.2	10.9	39.5	7.5	81.7	-0.0330477	-0.184783
Papilio polytes	KM215138.1	15260	Ditrysia	Papilionoidea	Papilionidae	40.7	11.9	39.5	7.9	80.2	-0.0149626	-0.20202
Parnassius epaphus	KM373898.1	15458	Ditrysia	Papilionoidea	Papilionidae	41.4	11.1	40	7.5	81.4	-0.017199	-0.193548
Hamadryas epinome	KM378244.1	15207	Ditrysia	Papilionoidea	Nymphalidae	42	11	39.5	7.5	81.5	-0.0306748	-0.189189
Parnassius imperator	KM507326.1	15424	Ditrysia	Papilionoidea	Papilionidae	41.1	11.4	40	7.5	81.1	-0.0135635	-0.206349
Japonica lutea	KM655768.1	15225	Ditrysia	Papilionoidea	Lycaenidae	42.8	10.4	39.3	7.6	82.1	-0.0426309	-0.155556
Heliconius melpomene rosina	KP100653.1	15327	Ditrysia	Papilionoidea	Nymphalidae	42.3	10.9	39.3	7.5	81.6	-0.0367647	-0.184783
Parnassius cephalus	KP100655.1	15343	Ditrysia	Papilionoidea	Papilionidae	41.2	11.1	40.2	7.5	81.4	-0.012285	-0.193548
Graphium chironides	KP159289.1	15235	Ditrysia	Papilionoidea	Papilionidae	40.8	11.9	39.6	7.7	80.4	-0.0149254	-0.214286
Papilio helenus	KP247522.1	15607	Ditrysia	Papilionoidea	Papilionidae	40.6	12.2	39.6	7.6	80.2	-0.0124688	-0.232323
Stichophthalma louisa	KP247523.1	15721	Ditrysia	Papilionoidea	Nymphalidae	41	12.9	38.7	7.4	79.7	-0.0288582	-0.270936
Heliconius sara	KP281778.1	15372	Ditrysia	Papilionoidea	Nymphalidae	41.3	11.6	39.4	7.8	80.7	-0.023544	-0.195876
Chitoria ulupi	KP284554.1	15279	Ditrysia	Papilionoidea	Nymphalidae	41	12.4	38.9	7.8	79.9	-0.0262829	-0.227723
Heliconius ismenius	KP294327.1	15346	Ditrysia	Papilionoidea	Nymphalidae	41.8	11.3	39.4	7.5	81.2	-0.0295567	-0.202128
Colias erate	KP715146.1	15184	Ditrysia	Papilionoidea	Pieridae	41.4	11.2	39.9	7.5	81.3	-0.0184502	-0.197861
Teinopalpus imperialis	KR018842.1	15229	Ditrysia	Papilionoidea	Papilionidae	40	12.6	39.6	7.8	79.6	-0.00502513	-0.235294
Euripus nyctelius	KR020515.1	15417	Ditrysia	Papilionoidea	Nymphalidae	40.2	12.2	39.7	7.8	79.9	-0.00625782	-0.22
Papilio demoleus	KR024009.1	15249	Ditrysia	Papilionoidea	Papilionidae	41.6	11.3	39.3	7.8	80.9	-0.0284302	-0.183246
Cethosia biblis	KR066948.1	15286	Ditrysia	Papilionoidea	Nymphalidae	42.8	11.9	37.4	7.9	80.2	-0.0673317	-0.20202
Idea leuconoe	KR815449.1	15278	Ditrysia	Papilionoidea	Nymphalidae	41.3	12	39.1	7.5	80.4	-0.0273632	-0.230769
Papilio glaucus	KR822739.1	15306	Ditrysia	Papilionoidea	Papilionidae	40.5	11.9	40	7.6	80.5	-0.00621118	-0.220513
Polyura schreiber	KT232257.1	15420	Ditrysia	Papilionoidea	Nymphalidae	41.9	11.3	39	7.8	80.9	-0.0358467	-0.183246
Herona marathus	KT279805.1	15487	Ditrysia	Papilionoidea	Nymphalidae	40.3	12.5	39.7	7.5	80	-0.0075	-0.25
Junonia coenia	KT380025.1	15222	Ditrysia	Papilionoidea	Nymphalidae	41.1	11.6	39.6	7.7	80.7	-0.0185874	-0.202073
Shijimiaeoides divina	KT897723.1	15259	Ditrysia	Papilionoidea	Lycaenidae	41.4	10.3	41	7.2	82.4	-0.00485437	-0.177143
Eurema blanda	KU160635.1	15123	Ditrysia	Papilionoidea	Pieridae	41.1	12.1	39.5	7.4	80.6	-0.0198511	-0.241026
Papilio xuthus	KU356933.1	15359	Ditrysia	Papilionoidea	Papilionidae	40.7	12	39.7	7.6	80.4	-0.0124378	-0.22449
Luehdorfia chinensis	KU360130.1	15550	Ditrysia	Papilionoidea	Papilionidae	41.1	11.2	40.3	7.3	81.4	-0.00982801	-0.210811
Junonia iphita	KU577290.1	15190	Ditrysia	Papilionoidea	Nymphalidae	41.1	11.6	39.6	7.8	80.7	-0.0185874	-0.195876
Tirumala limniace	KX889069.1	15278	Ditrysia	Papilionoidea	Nymphalidae	42.8	11.7	38.1	7.5	80.9	-0.0580964	-0.21875
Parnassius choui	KY072797.1	15367	Ditrysia	Papilionoidea	Papilionidae	41.2	11.1	40.3	7.4	81.5	-0.0110429	-0.2
Papilio protenor	KY272622.1	15268	Ditrysia	Papilionoidea	Papilionidae	41	12	39.5	7.5	80.5	-0.0186335	-0.230769
Limenitis doerriesi	KY569552.1	15233	Ditrysia	Papilionoidea	Nymphalidae	42.3	11.2	38.8	7.6	81.1	-0.0431566	-0.191489
Limenitis moltrechti	KY569554.1	15178	Ditrysia	Papilionoidea	Nymphalidae	41.8	11.7	39	7.5	80.8	-0.0346535	-0.21875
Limenitis amphyssa	KY569555.1	15164	Ditrysia	Papilionoidea	Nymphalidae	41.9	11.4	39	7.6	80.9	-0.0358467	-0.2
Argynnis sagana	KY971464.1	15151	Ditrysia	Papilionoidea	Nymphalidae	41.7	11.4	39.3	7.6	81	-0.0296296	-0.2
Nymphalis c-aureum	MF407452.1	15209	Ditrysia	Papilionoidea	Nymphalidae	40.5	11.9	40.1	7.5	80.6	-0.00496278	-0.226804
Apatura laverna	MF444860.1	15187	Ditrysia	Papilionoidea	Nymphalidae	40.2	12.2	39.7	7.9	79.9	-0.00625782	-0.21393
Parnassius nomion	MF496134.1	15362	Ditrysia	Papilionoidea	Papilionidae	41.3	11.1	40	7.6	81.3	-0.0159902	-0.187166
Neptis alwina	MG457128.1	15226	Ditrysia	Papilionoidea	Nymphalidae	42.3	11.1	38.9	7.7	81.2	-0.0418719	-0.180851
Vanessa indica	MG736927.1	15191	Ditrysia	Papilionoidea	Nymphalidae	39.9	12.3	40.1	7.6	80	0.0025	-0.236181
Lasiommata deidamia	MG880214.1	15244	Ditrysia	Papilionoidea	Nymphalidae	41.9	11.3	39.2	7.6	81.1	-0.0332922	-0.195767
Precis andremiaja	MH917706.1	15239	Ditrysia	Papilionoidea	Nymphalidae	40.5	12	39.9	7.6	80.4	-0.00746269	-0.22449
Salamis anteva	MH917707.1	15201	Ditrysia	Papilionoidea	Nymphalidae	40	11.8	40.6	7.6	80.6	0.00744417	-0.216495
Graphium doson	MK144328.1	15285	Ditrysia	Papilionoidea	Papilionidae	41.1	11.5	39.8	7.6	80.9	-0.0160692	-0.204188
Pontia edusa	MK252290.1	15125	Ditrysia	Papilionoidea	Pieridae	40	12.2	39.9	7.9	79.9	-0.00125156	-0.21393
Delias pasithoe	MK252291.1	15203	Ditrysia	Papilionoidea	Pieridae	39.6	13.1	39.6	7.7	79.2	0	-0.259615
Appias nero	MK263223.1	15099	Ditrysia	Papilionoidea	Pieridae	40.5	13.1	38.4	8.1	78.9	-0.026616	-0.235849
Appias lyncida	MK263224.1	15082	Ditrysia	Papilionoidea	Pieridae	41.6	12.1	38.6	7.7	80.2	-0.0374065	-0.222222
Prioneris clemanthe	MK263225.1	15131	Ditrysia	Papilionoidea	Pieridae	41.3	11.9	39.5	7.4	80.8	-0.0222772	-0.233161
Minois dryas	MK521433.1	15195	Ditrysia	Papilionoidea	Nymphalidae	41.2	12.1	39	7.7	80.2	-0.0274314	-0.222222
Papilio machaon annae	MK602655.1	15339	Ditrysia	Papilionoidea	Papilionidae	41.5	11.6	39.4	7.6	80.9	-0.025958	-0.208333
Troides aeacus formosanus	MK801139.1	15224	Ditrysia	Papilionoidea	Papilionidae	41.7	12.3	38.5	7.6	80.2	-0.0399002	-0.236181
Hestina assimilis	MN182752.1	15262	Ditrysia	Papilionoidea	Nymphalidae	41.1	11.4	40	7.5	81.1	-0.0135635	-0.206349
Mycalesis intermedia	MN610565.1	15386	Ditrysia	Papilionoidea	Nymphalidae	41.6	11.8	39.2	7.3	80.8	-0.029703	-0.235602
Junonia stygia	MN623383.1	15233	Ditrysia	Papilionoidea	Nymphalidae	39.8	12.8	39.7	7.7	79.5	-0.00125786	-0.24878
Papilio paris	MN629008.1	15363	Ditrysia	Papilionoidea	Papilionidae	40.9	11.9	39.6	7.5	80.5	-0.0161491	-0.226804
Ypthima baldus	MN708051.1	15304	Ditrysia	Papilionoidea	Nymphalidae	42.2	11.7	38.6	7.5	80.8	-0.0445545	-0.21875
Parnassius mercurius	MN728989.1	15372	Ditrysia	Papilionoidea	Papilionidae	41.3	11.1	40.1	7.5	81.4	-0.014742	-0.193548
Nymphalis ladakensis	MN732892.1	15222	Ditrysia	Papilionoidea	Nymphalidae	40.6	11.9	40	7.6	80.6	-0.00744417	-0.220513
Coenonympha amaryllis	MN756798.1	15125	Ditrysia	Papilionoidea	Nymphalidae	41.3	12.6	38.2	8	79.5	-0.0389937	-0.223301
Parantica aglea aglea	MN938921.1	15214	Ditrysia	Papilionoidea	Nymphalidae	41.2	12.7	38.4	7.7	79.6	-0.0351759	-0.245098
Plebejus argus	MN974526.1	15426	Ditrysia	Papilionoidea	Lycaenidae	41.3	10.4	40.8	7.4	82.1	-0.00609013	-0.168539
Hipparchia autonoe	MT090762.1	15300	Ditrysia	Papilionoidea	Nymphalidae	40.1	13.1	38.8	8	78.9	-0.0164766	-0.241706
Hestina persimilis	MT110153.1	15252	Ditrysia	Papilionoidea	Nymphalidae	41.2	11.5	39.7	7.6	80.9	-0.0185414	-0.204188
Hestinalis nama	MT110154.1	15208	Ditrysia	Papilionoidea	Nymphalidae	39.3	12.9	39.9	7.9	79.2	0.00757576	-0.240385
Lopinga achine	MT117843.1	15284	Ditrysia	Papilionoidea	Nymphalidae	40.5	12.9	38.9	7.6	79.4	-0.0201511	-0.258537
Graphium parus	MT198821.1	15231	Ditrysia	Papilionoidea	Papilionidae	39.8	12.2	40.1	7.9	79.9	0.00375469	-0.21393
Colias fieldii	MT371042.1	15150	Ditrysia	Papilionoidea	Pieridae	41.2	11.4	39.8	7.7	81	-0.017284	-0.193717
Anthocharis scolymus	MT499329.1	15230	Ditrysia	Papilionoidea	Pieridae	41.5	11.9	38.9	7.6	80.4	-0.0323383	-0.220513
Pieris napi	MT576638.1	15178	Ditrysia	Papilionoidea	Pieridae	39.6	12.2	40.5	7.7	80.1	0.011236	-0.226131
Protogoniomorpha anacardii duprei	MT702382.1	15220	Ditrysia	Papilionoidea	Nymphalidae	39.9	12.3	40.1	7.7	80	0.0025	-0.23
Kallimoides rumia	MT704827.1	15234	Ditrysia	Papilionoidea	Nymphalidae	40.8	11.6	40.1	7.5	80.9	-0.00865266	-0.21466
Doleschallia melana	MT704829.1	15269	Ditrysia	Papilionoidea	Nymphalidae	39.8	12.4	40.3	7.6	80.1	0.0062422	-0.24
Anartia jatrophae saturata	MT712074.1	15297	Ditrysia	Papilionoidea	Nymphalidae	42.3	11.1	39.1	7.5	81.4	-0.039312	-0.193548
Araschnia levana	MT712075.1	15207	Ditrysia	Papilionoidea	Nymphalidae	41.2	10.9	40.5	7.4	81.7	-0.00856793	-0.191257
Dodona eugenes	MT890732.1	15680	Ditrysia	Papilionoidea	Riodinidae	41.3	11.1	39.7	7.9	81	-0.0197531	-0.168421
Pieris naganum	MW013541.1	15155	Ditrysia	Papilionoidea	Pieridae	39.8	12.4	39.9	7.9	79.7	0.00125471	-0.221675
Ahlbergia ferrea	MW074891.1	15443	Ditrysia	Papilionoidea	Lycaenidae	43.1	9.8	39.8	7.3	82.9	-0.039807	-0.146199
Ahlbergia frivaldszkyi	MW074892.1	15855	Ditrysia	Papilionoidea	Lycaenidae	43.2	9.8	39.8	7.2	83	-0.0409639	-0.152941
Kallima paralekta	MW192438.1	15200	Ditrysia	Papilionoidea	Nymphalidae	39.8	12.7	39.7	7.8	79.5	-0.00125786	-0.239024
Parantica sita	MW470953.1	15202	Ditrysia	Papilionoidea	Nymphalidae	41.6	12	39	7.4	80.6	-0.0322581	-0.237113
Baeotus beotus	MW566598.1	15131	Ditrysia	Papilionoidea	Nymphalidae	40.6	11.9	39.8	7.7	80.4	-0.00995025	-0.214286
Polyura narcaeus	MW683125.1	15319	Ditrysia	Papilionoidea	Nymphalidae	42.1	11.2	39.2	7.6	81.3	-0.0356704	-0.191489
Catacroptera cloanthe	MW722786.1	15204	Ditrysia	Papilionoidea	Nymphalidae	39.5	13.2	39.3	8	78.8	-0.00253807	-0.245283
Teinopalpus aureus wuyiensis	MW900433.1	15234	Ditrysia	Papilionoidea	Papilionidae	40	12.5	39.8	7.7	79.8	-0.00250627	-0.237624
Smyrna blomfildia	MZ151338.1	15149	Ditrysia	Papilionoidea	Nymphalidae	39.9	12.8	39.6	7.7	79.5	-0.00377358	-0.24878
Nymphalis io geisha	MZ322948.1	15252	Ditrysia	Papilionoidea	Nymphalidae	40.5	11.9	40.1	7.5	80.6	-0.00496278	-0.226804
Pachliopta aristolochiae	MZ781228.1	15235	Ditrysia	Papilionoidea	Papilionidae	42.3	11	39.3	7.3	81.6	-0.0367647	-0.202186
Diaethria gabaza eupepla	MZ981736.1	15156	Ditrysia	Papilionoidea	Nymphalidae	40.7	11.7	39.8	7.8	80.5	-0.0111801	-0.2
Sasakia charonda	NC_014224.1	15244	Ditrysia	Papilionoidea	Nymphalidae	40.2	12.3	39.7	7.9	79.9	-0.00625782	-0.217822
Protantigius superans	NC_016016.1	15248	Ditrysia	Papilionoidea	Lycaenidae	42.3	10.7	39.4	7.6	81.7	-0.0354957	-0.169399
Issoria lathonia	NC_018030.1	15172	Ditrysia	Papilionoidea	Nymphalidae	41.8	11.2	39.3	7.6	81.1	-0.0308261	-0.191489
Papilio machaon	NC_018047.1	15185	Ditrysia	Papilionoidea	Papilionidae	41.4	11.8	38.9	7.9	80.3	-0.0311333	-0.19797
Papilio maackii	NC_021411.1	15357	Ditrysia	Papilionoidea	Papilionidae	40.9	11.7	39.8	7.6	80.7	-0.0136307	-0.212435
Pieris canidia	NC_026532.1	15153	Ditrysia	Papilionoidea	Pieridae	39.3	12.5	40.4	7.9	79.7	0.0138018	-0.22549
Lethe albolineata	NC_028507.1	15248	Ditrysia	Papilionoidea	Nymphalidae	40.9	12.9	38.3	7.9	79.2	-0.0328283	-0.240385
Limenitis sydyi	NC_034233.1	15200	Ditrysia	Papilionoidea	Nymphalidae	42.1	11.3	39.1	7.5	81.2	-0.0369458	-0.202128
Limenitis helmanni	NC_034754.1	15178	Ditrysia	Papilionoidea	Nymphalidae	42.3	11.3	38.8	7.6	81.1	-0.0431566	-0.195767
Papilio memnon	NC_043911.1	15262	Ditrysia	Papilionoidea	Papilionidae	40.2	12.6	39.6	7.6	79.8	-0.0075188	-0.247525
Oeneis urda	NC_046889.1	15248	Ditrysia	Papilionoidea	Nymphalidae	40.9	12.2	39.1	7.9	80	-0.0225	-0.21393
Lelecella limenitoides	NC_050060.1	15203	Ditrysia	Papilionoidea	Nymphalidae	41.8	10.9	39.7	7.5	81.5	-0.0257669	-0.184783
Mallika jacksoni	NC_050692.1	15193	Ditrysia	Papilionoidea	Nymphalidae	40.3	12.7	39.1	8	79.4	-0.0151134	-0.227053
Appias albina	NC_053734.1	15193	Ditrysia	Papilionoidea	Pieridae	40.9	12.4	38.6	8	79.5	-0.0289308	-0.215686
Papilio elwesi	OK052950.1	15082	Ditrysia	Papilionoidea	Papilionidae	39.4	12.9	40.1	7.6	79.5	0.00880503	-0.258537
Graphium confucius	OK136253.1	15212	Ditrysia	Papilionoidea	Papilionidae	39.3	12.8	39.8	8.1	79.1	0.00632111	-0.22488
Teinopalpus aureus	OL449692.1	15234	Ditrysia	Papilionoidea	Papilionidae	40	12.5	39.8	7.7	79.8	-0.00250627	-0.237624
Diatraea saccharalis	FJ240227.1	15490	Ditrysia	Pyraloidea	Crambidae	39.2	12.6	40.9	7.4	80.1	0.0212235	-0.26
Maruca vitrata	HM751150.1	14054	Ditrysia	Pyraloidea	Crambidae	39.9	11.8	40.1	8.2	80	0.0025	-0.18
Chilo suppressalis	HQ860290.1	15465	Ditrysia	Pyraloidea	Crambidae	39.5	12.6	40.2	7.7	79.7	0.00878294	-0.241379
Corcyra cephalonica	HQ897685.1	15273	Ditrysia	Pyraloidea	Pyralidae	41.7	11.9	38.8	7.6	80.5	-0.0360248	-0.220513
Cnaphalocrocis medinalis	JQ305693.1	15377	Ditrysia	Pyraloidea	Crambidae	41.9	10.5	40.1	7.5	82	-0.0219512	-0.166667
Paracymoriza prodigalis	JX144892.1	15326	Ditrysia	Pyraloidea	Crambidae	40.7	10.9	40.8	7.5	81.5	0.00122699	-0.184783
Conogethes punctiferalis	JX448619.1	15355	Ditrysia	Pyraloidea	Crambidae	41.3	11.7	39.3	7.7	80.6	-0.0248139	-0.206186
Elophila interruptalis	KC894961.1	15351	Ditrysia	Pyraloidea	Crambidae	40.6	12.1	39.7	7.6	80.3	-0.011208	-0.228426
Glyphodes quadrimaculalis	KF234079.1	15255	Ditrysia	Pyraloidea	Crambidae	40.7	11.4	40.1	7.8	80.8	-0.00742574	-0.1875
Scirpophaga incertulas	KF751706.1	15220	Ditrysia	Pyraloidea	Crambidae	37.5	15.1	39.7	7.8	77.2	0.0284974	-0.318777
Paracymoriza distinctalis	KF859965.1	15354	Ditrysia	Pyraloidea	Crambidae	41.2	10.2	41	7.5	82.2	-0.00243309	-0.152542
Chilo auricilius	KJ174087.1	15367	Ditrysia	Pyraloidea	Crambidae	41.4	10.8	40.7	7.2	82.1	-0.00852619	-0.2
Maruca testulalis	KJ623250.1	15110	Ditrysia	Pyraloidea	Crambidae	40.6	11.2	40.2	8	80.8	-0.0049505	-0.166667
Hellula undalis	KJ636057.1	14678	Ditrysia	Pyraloidea	Crambidae	40.5	12.2	39.4	8	79.9	-0.0137672	-0.207921
Spoladea recurvalis	KJ739310.1	15273	Ditrysia	Pyraloidea	Crambidae	41.4	11.3	39.5	7.8	80.9	-0.0234858	-0.183246
Ostrinia penitalis	KM395814.1	12612	Ditrysia	Pyraloidea	Crambidae	37.8	12.2	41.1	8.9	78.9	0.0418251	-0.156398
Glyphodes pyloalis	KM576860.1	14960	Ditrysia	Pyraloidea	Crambidae	41	11.5	39.7	7.8	80.7	-0.016109	-0.19171
Loxostege sticticalis	KR080490.1	15218	Ditrysia	Pyraloidea	Crambidae	40.3	11.4	40.5	7.8	80.8	0.00247525	-0.1875
Haritalodes derogata	KR233479.1	15253	Ditrysia	Pyraloidea	Crambidae	40.3	11.8	40.4	7.5	80.7	0.00123916	-0.222798
Pyrinioides aurea	KT337662.1	15362	Ditrysia	Pyraloidea	Thyrididae	40	12.2	40	7.9	80	0	-0.21393
Amyelois transitella	KT692987.1	15205	Ditrysia	Pyraloidea	Pyralidae	41.7	12.6	37.9	7.8	79.6	-0.0477387	-0.235294
Pycnarmon lactiferalis	KX426346.1	15219	Ditrysia	Pyraloidea	Crambidae	41	10.7	40.7	7.6	81.7	-0.00367197	-0.169399
Euzophera pyriella	KY825744.1	15184	Ditrysia	Pyraloidea	Pyralidae	42	12.5	37.8	7.6	79.8	-0.0526316	-0.243781
Meroptera pravella	MF073207.1	15260	Ditrysia	Pyraloidea	Pyralidae	41.1	11.6	39.6	7.8	80.7	-0.0185874	-0.195876
Nagiella inferior	MF373813.1	15348	Ditrysia	Pyraloidea	Crambidae	40.4	11.3	41.1	7.2	81.5	0.00858896	-0.221622
Ephestia elutella	MG748858.1	15346	Ditrysia	Pyraloidea	Pyralidae	42.1	11.8	38.6	7.6	80.7	-0.0433705	-0.216495
Omiodes indicata	MG770232.1	15367	Ditrysia	Pyraloidea	Crambidae	41.3	10.7	40.3	7.7	81.6	-0.0122549	-0.163043
Palpita hypohomalia	MH013483.1	15280	Ditrysia	Pyraloidea	Crambidae	40.5	11.4	40.5	7.6	81	0	-0.2
Ostrinia palustralis	MH574940.1	15246	Ditrysia	Pyraloidea	Crambidae	38.8	11.6	41.8	7.8	80.6	0.0372208	-0.195876
Cydalima perspectalis	MH602288.1	15232	Ditrysia	Pyraloidea	Crambidae	41.1	11.4	39.8	7.7	80.9	-0.0160692	-0.193717
Cathayia obliquella	MK550620.1	15408	Ditrysia	Pyraloidea	Pyralidae	41.8	11.9	38.8	7.5	80.6	-0.0372208	-0.226804
Orthaga olivacea	MN078362.1	15174	Ditrysia	Pyraloidea	Pyralidae	41.2	12.8	37.8	8.2	79	-0.043038	-0.219048
Pyralis farinalis	MN442120.1	15204	Ditrysia	Pyraloidea	Pyralidae	40.4	13.6	37.9	8	78.3	-0.0319285	-0.259259
Orthopygia glaucinalis	MN461479.1	15229	Ditrysia	Pyraloidea	Pyralidae	41.3	12.7	37.9	8.1	79.2	-0.0429293	-0.221154
Plodia interpunctella	MN619781.1	15403	Ditrysia	Pyraloidea	Pyralidae	42.1	12.2	38.2	7.5	80.3	-0.0485679	-0.238579
Loxostege aeruginalis	MN635734.1	15339	Ditrysia	Pyraloidea	Crambidae	39.6	12.1	40.5	7.8	80.1	0.011236	-0.21608
Loxostege turbidalis	MN646773.1	15240	Ditrysia	Pyraloidea	Crambidae	39.3	12.1	40.7	7.9	80	0.0175	-0.21
Dioryctria yiai	MN658208.1	15430	Ditrysia	Pyraloidea	Pyralidae	42	11.3	39	7.7	81	-0.037037	-0.189474
Ostrinia furnacalis	MN747041.1	15241	Ditrysia	Pyraloidea	Crambidae	39.2	11.4	41.7	7.7	80.9	0.0309023	-0.193717
Marasmia exigua	MN877384.1	15262	Ditrysia	Pyraloidea	Crambidae	41.1	10.9	40.5	7.6	81.6	-0.00735294	-0.178378
Pyrausta despicata	MN956508.1	15389	Ditrysia	Pyraloidea	Crambidae	40.1	11.4	40.8	7.6	80.9	0.00865266	-0.2
Oncocera semirubella	MT012820.1	15290	Ditrysia	Pyraloidea	Pyralidae	41.7	11.1	39.7	7.6	81.4	-0.02457	-0.187166
Lista haraldusalis	MT081380.1	15213	Ditrysia	Pyraloidea	Pyralidae	41.1	10.8	40.5	7.7	81.6	-0.00735294	-0.167568
Ostrinia nubilalis	MT492030.1	14838	Ditrysia	Pyraloidea	Crambidae	38.9	11.6	41.6	7.8	80.5	0.0335404	-0.195876
Ostrinia kasmirica	MT978075.1	15214	Ditrysia	Pyraloidea	Crambidae	39.2	11.3	41.8	7.7	81	0.0320988	-0.189474
Aglossa dimidiata	MW542312.1	15225	Ditrysia	Pyraloidea	Pyralidae	41.2	12.8	37.9	8.1	79.1	-0.0417193	-0.22488
Lamoria adaptella	MZ853170.1	15439	Ditrysia	Pyraloidea	Pyralidae	40.5	12.3	39.6	7.6	80.1	-0.011236	-0.236181
Tyspanodes hypsalis	NC_025569.1	15329	Ditrysia	Pyraloidea	Crambidae	41.4	10.9	40	7.7	81.4	-0.017199	-0.172043
Crambus perlellus	NC_061606.1	15440	Ditrysia	Pyraloidea	Crambidae	41	11.2	40.3	7.5	81.3	-0.00861009	-0.197861
Endotricha kuznetzovi	NC_061642.1	15244	Ditrysia	Pyraloidea	Pyralidae	41.7	11.6	39	7.6	80.7	-0.0334572	-0.208333
Sitochroa verticalis	NC_062118.1	15275	Ditrysia	Pyraloidea	Crambidae	40.1	11.7	40.5	7.8	80.6	0.00496278	-0.2
Choreutis emplecta	MG581932.1	14718	Ditrysia	Sesioidea	Choreutidae	40.8	11.4	39.9	7.9	80.7	-0.0111524	-0.181347
Sesia siningensis	MN708363.1	15454	Ditrysia	Sesioidea	Sesiidae	38.6	12.5	41	7.9	79.6	0.0301508	-0.22549
Mahasena oolona	KY856825.1	16119	Ditrysia	Tineoidea	Psychidae	40.4	10.5	42.5	6.7	82.9	0.0253317	-0.22093
Amorophaga japonica	MH823253.1	15027	Ditrysia	Tineoidea	Tineidae	39.4	10.9	42.3	7.5	81.7	0.0354957	-0.184783
Monopis longella	MH992770.1	15541	Ditrysia	Tineoidea	Tineidae	42	11.2	39.8	7	81.8	-0.0268949	-0.230769
Caloptilia theivora	MK541932.1	15297	Ditrysia	Tineoidea	Gracillariidae	39.7	11.4	41	7.9	80.7	0.016109	-0.181347
Dahlica ochrostigma	MK890245.1	15429	Ditrysia	Tineoidea	Psychidae	39.1	11.1	42.8	7	81.9	0.045177	-0.226519
Gibbovalva kobusi	MK956103.1	15717	Ditrysia	Tineoidea	Gracillariidae	39.5	11.6	41	7.9	80.5	0.0186335	-0.189744
Eumeta variegata	MN242985.1	15793	Ditrysia	Tineoidea	Psychidae	39.5	11.1	42.1	7.3	81.6	0.0318627	-0.206522
Eudarcia gwangneungensis	MN413148.1	15391	Ditrysia	Tineoidea	Meessiidae	39.4	12.7	40.4	7.4	79.8	0.0125313	-0.263682
Corythoxestis sunosei	MT611524.1	15511	Ditrysia	Tineoidea	Gracillariidae	41.7	10.6	40	7.6	81.7	-0.0208078	-0.164835
Acanthopsyche nigraplaga	MT883999.1	15704	Ditrysia	Tineoidea	Psychidae	39.3	13.1	40.7	7	80	0.0175	-0.303483
Adoxophyes honmai	DQ073916.1	15680	Ditrysia	Tortricoidea	Tortricidae	40.2	11.7	40.2	7.9	80.4	0	-0.193878
Spilonota lechriaspis	HM204705.1	15368	Ditrysia	Tortricoidea	Tortricidae	41.3	11.2	39.9	7.6	81.2	-0.0172414	-0.191489
Grapholita molesta	HQ116416.1	15776	Ditrysia	Tortricoidea	Tortricidae	40.9	11	40.4	7.7	81.3	-0.00615006	-0.176471
Rhyacionia leptotubula	JX028270.1	15877	Ditrysia	Tortricoidea	Tortricidae	40.2	12.1	40.1	7.6	80.3	-0.00124533	-0.228426
Cydia pomonella	JX407107.2	15253	Ditrysia	Tortricoidea	Tortricidae	40.2	12	39.9	7.9	80.1	-0.00374532	-0.20603
Adoxophyes orana	JX872403.1	15343	Ditrysia	Tortricoidea	Tortricidae	40	12.1	39.9	7.9	79.9	-0.00125156	-0.21
Grapholita dimorpha	KJ671625.1	15813	Ditrysia	Tortricoidea	Tortricidae	40.9	11.4	40	7.8	80.9	-0.0111248	-0.1875
Lobesia botrana	KP677508.1	15229	Ditrysia	Tortricoidea	Tortricidae	40	12	40.1	7.9	80.1	0.00124844	-0.20603
Eudemis lucina	MK820027.1	16056	Ditrysia	Tortricoidea	Tortricidae	39.9	11.6	40.6	7.8	80.5	0.00869565	-0.195876
Phiaris dolosana	MK962620.1	15562	Ditrysia	Tortricoidea	Tortricidae	39.9	11.7	40.6	7.8	80.5	0.00869565	-0.2
Celypha flavipalpana	MN956509.1	15498	Ditrysia	Tortricoidea	Tortricidae	39.8	11.8	40.5	7.9	80.3	0.00871731	-0.19797
Grapholita delineana	MT165691.1	15599	Ditrysia	Tortricoidea	Tortricidae	40.4	11.2	40.6	7.8	81	0.00246914	-0.178947
Celypha sp. DX-2020	MT548574.1	15691	Ditrysia	Tortricoidea	Tortricidae	40.2	11.4	40.6	7.8	80.8	0.0049505	-0.1875
Cochylimorpha cultana	MW413306.1	15348	Ditrysia	Tortricoidea	Tortricidae	40.1	11.3	40.8	7.9	80.9	0.00865266	-0.177083
Cochylidia moguntiana	MW413307.1	15433	Ditrysia	Tortricoidea	Tortricidae	39.8	11.4	40.8	8	80.6	0.0124069	-0.175258
Eugnosta dives	MW491464.1	15392	Ditrysia	Tortricoidea	Tortricidae	40.3	11.7	40.2	7.7	80.5	-0.00124224	-0.206186
Clepsis pallidana	MZ636560.1	15679	Ditrysia	Tortricoidea	Tortricidae	40.1	11.1	41.2	7.7	81.3	0.0135301	-0.180851
Plutella xylostella	JF911819.1	16179	Ditrysia	Yponomeutoidea	Plutellidae	40.5	10.9	40.9	7.7	81.4	0.004914	-0.172043
Leucoptera malifoliella	JN790955.1	15646	Ditrysia	Yponomeutoidea	Lyonetiidae	40.6	10.4	41.9	7	82.5	0.0157576	-0.195402
Prays oleae	KM874804.1	16499	Ditrysia	Yponomeutoidea	Praydidae	40.1	10.7	41.7	7.5	81.8	0.0195599	-0.175824
Argyresthia conjugella	ON496993.1	16044	Ditrysia	Yponomeutoidea	Argyresthiidae	41.2	10.6	40.8	7.4	82	-0.00487805	-0.177778
Monema flavescens	KY628213.1	15406	Ditrysia	Zygaenoidea	Limacodidae	39.7	11.9	40.8	7.6	80.5	0.0136646	-0.220513
Pidorus atratus	MG882482.1	15383	Ditrysia	Zygaenoidea	Zygaenidae	39.5	12.1	40.3	8	79.8	0.0100251	-0.20398
Narosa nigrisigna	MH675969.1	15292	Ditrysia	Zygaenoidea	Limacodidae	42.2	11.1	39	7.7	81.2	-0.0394089	-0.180851
Iragoides fasciata	MK250437.1	15645	Ditrysia	Zygaenoidea	Limacodidae	42	10.8	40	7.2	82	-0.0243902	-0.2
Phauda flammans	MN150296.1	15470	Ditrysia	Zygaenoidea	Zygaenidae	41.9	10.8	40.1	7.1	82	-0.0219512	-0.206704
Illiberis ulmivora	MT075808.1	15334	Ditrysia	Zygaenoidea	Zygaenidae	41.9	11.2	39.6	7.4	81.5	-0.0282209	-0.204301
Illiberis pruni	MZ726799.1	15252	Ditrysia	Zygaenoidea	Zygaenidae	42.3	10.3	39.9	7.4	82.2	-0.0291971	-0.163842
Eterusia aedea	MZ964410.1	15192	Ditrysia	Zygaenoidea	Zygaenidae	40	12.4	39.6	8.1	79.6	-0.00502513	-0.209756
Histia rhodope	NC_039447.1	15209	Ditrysia	Zygaenoidea	Zygaenidae	38.7	13.4	39.8	8.2	78.5	0.0140127	-0.240741
Amesia sanguiflua	NC_046467.1	15203	Ditrysia	Zygaenoidea	Zygaenidae	39.8	12.4	40	7.8	79.8	0.00250627	-0.227723
Parasa consocia	OK149235.1	15548	Ditrysia	Zygaenoidea	Limacodidae	40.5	11.8	40.3	7.4	80.8	-0.00247525	-0.229167
Napialus hunanensis	KJ632465.1	15301	Exoporia	Hepialoidea	Hepialidae	41.2	10.6	40.7	7.6	81.9	-0.00610501	-0.164835
Thitarodes gonggaensis	KP718817.1	15940	Exoporia	Hepialoidea	Hepialidae	40.2	11.2	41.1	7.4	81.3	0.0110701	-0.204301
Endoclita signifer	KT780172.1	15285	Exoporia	Hepialoidea	Hepialidae	41.4	10.5	40.5	7.6	81.9	-0.010989	-0.160221
Hepialus xiaojinensis	KT834973.1	15397	Exoporia	Hepialoidea	Hepialidae	39.7	11.5	41.4	7.4	81.1	0.0209618	-0.216931
Thitarodes sejilaensis	KU053201.1	15290	Exoporia	Hepialoidea	Hepialidae	40	11.6	40.9	7.5	80.9	0.0111248	-0.21466
Thitarodes sp. XK-2016	KX527574.1	16280	Exoporia	Hepialoidea	Hepialidae	40.2	11.2	41	7.6	81.2	0.00985222	-0.191489
Triodia sylvina	MH105794.1	15040	Exoporia	Hepialoidea	Hepialidae	41.2	10.4	41	7.5	82.2	-0.00243309	-0.162011
Thitarodes pui	MK599283.1	15928	Exoporia	Hepialoidea	Hepialidae	40.4	11.3	41	7.3	81.4	0.00737101	-0.215054
Thitarodes damxungensis	MK648145.1	15362	Exoporia	Hepialoidea	Hepialidae	41.2	10.3	41.3	7.2	82.5	0.00121212	-0.177143
Thitarodes sp.	MZ675586.1	15389	Exoporia	Hepialoidea	Hepialidae	40.8	10.4	41.5	7.2	82.3	0.00850547	-0.181818
Thitarodes sp. n. ZW-2019	MZ675587.1	15612	Exoporia	Hepialoidea	Hepialidae	39.7	11.8	41.3	7.3	81	0.0197531	-0.235602
Thitarodes sp.	MZ675588.1	15496	Exoporia	Hepialoidea	Hepialidae	39.6	11.8	41.2	7.4	80.8	0.019802	-0.229167
Thitarodes sp. HN19	OL470656.1	16055	Exoporia	Hepialoidea	Hepialidae	40.1	11.3	40.9	7.6	81	0.00987654	-0.195767
Thitarodes sp. XS20	OL470657.1	14553	Exoporia	Hepialoidea	Hepialidae	40.5	10.7	41.2	7.6	81.7	0.00856793	-0.169399
Cheumatopsyche brevilineata	KX385010.1	15302	Integripalpia	Hydropsychidae	Hydropsychinae	38.6	14.5	39.2	7.7	77.8	0.00771208	-0.306306
Hydatophylax nigrovittatus	NC_043770.1	15048	Integripalpia	Limnephiloidea	Limnephilidae	36.7	15.8	38.9	8.5	75.6	0.0291005	-0.300412
Limnephilus hyalinus	NC_044710.1	15168	Integripalpia	Limnephiloidea	Limnephilidae	38.4	13.9	39.5	8.1	77.9	0.0141207	-0.263636
Phryganea cinerea	NC_039714.1	15043	Integripalpia	Phryganeoidea	Phryganeidae	39.1	14	39.2	7.7	78.3	0.00127714	-0.290323
Phryganopsyche latipennis	NC_043771.1	15167	Integripalpia	Phryganeoidea	Phryganopsychidae	39.5	13.4	39.1	8.1	78.6	-0.00508906	-0.246512
Stenopsyche angustata	NC_051529.1	15371	Integripalpia	Stenopsychidae	Stenopsychinae	35	15.5	41.6	7.8	76.6	0.0861619	-0.330472
Stenopsyche tienmushanensis	NC_058007.1	16049	Integripalpia	Stenopsychidae	Stenopsychinae	35.9	14.6	42	7.6	77.9	0.0783055	-0.315315
Lepidoptera sp. 1 TS-2018	MG748599.1	15294	NA	NA	NA	41.2	11.8	39.2	7.8	80.4	-0.0248756	-0.204082
