# Supplementary material for: Novel insight into lepidopteran phylogenetics from the mitochondrial genome of the apple fruit moth of the family Argyresthiidae
Source: BMC Genomics. 2024 Jan 2;25:21. doi: 10.1186/s12864-023-09905-1 (PMC10759517; doi:10.1186/s12864-023-09905-1)
Supplement: Supplementary file 2 — Additional file 2: Table S2. Results of two-tailed tests of substitution saturation for each codon position of the 13 PCGs. The following abbreviations were used: index of substitution saturation (ISS), critical value of ISS supposing symmetrical cladogenesis (ISS.CSym.), critical value of ISS supposing asymmetrical cladogenesis (ISS.CAsym.). [file 12864_2023_9905_MOESM2_ESM.xlsx]

## Sheet: Ark1
Table S2. Results of two-tailed tests of substitution saturation for each codon position of the 13 PCGs. The following abbreviations were used: index of substitution saturation (ISS), critical value of ISS supposing symmetrical cladogenesis (ISS.CSym.), critical value of ISS supposing asymmetrical cladogenesis (ISS.CAsym.).
Partition	DAMBE (Xia’s method)
	I	Iss	Iss.cSym	PSym	Iss.cAsym	PAsym
13PCGs_pos1	0.01639	0.246	0.695	0	0.367	0
13PCGs_pos2	0.04579	0.115	0.694	0	0.367	0
13PCGs_pos3	0	0.572	0.693	0	0.365	0
nad2_pos1	0.00939	0.315	0.684	0	0.36	0.1319
nad2_pos2	0.03755	0.333	0.724	0	0.401	0.0002
nad2_pos3	0	0.608	0.684	0.0093	0.361	0
cox1_pos1	0.05182	0.116	0.699	0	0.373	0
cox1_pos2	0.16432	0.041	0.7	0	0.374	0
cox1_pos3	0	0.565	0.697	0	0.371	0
cox2_pos1	0.03801	0.133	0.689	0	0.372	0
cox2_pos2	0.1102	0.048	0.689	0	0.372	0
cox2_pos3	0.00093	0.534	0.691	0	0.377	0
atp8_pos1	0.01379	0.347	2.249	0	3.038	0
atp8_pos2	0.02362	0.226	2.249	0	3.038	0
atp8_pos3	0	0.364	0.957	0	0.852	0
atp6_pos1	0.02096	0.224	0.718	0	0.43	0
atp6_pos2	0.08872	0.094	0.719	0	0.432	0
atp6_pos3	0.00095	0.612	0.722	0.0034	0.437	0
cox3_pos1	0.03078	0.174	0.683	0	0.359	0
cox3_pos2	0.07197	0.072	0.683	0	0.358	0
cox3_pos3	0	0.232	0.726	0	0.404	0
nad3_pos1	0.0111	0.281	0.805	0	0.587	0
nad3_pos2	0.03277	0.142	0.808	0	0.592	0
nad3_pos3	0	0.656	0.805	0.0008	0.587	0.1109
nad5_pos1	Overflow issues
nad5_pos2	0.06338	0.12	0.703	0	0.378	0
nad5_pos3	0.0002	0.549	0.703	0	0.378	0
nad4_pos1	0.02581	0.233	0.685	0	0.355	0
nad4_pos2	0.06894	0.12	0.685	0	0.355	0
nad4_pos3	0	0.542	0.685	0	0.355	0
nad4L_pos1	0.01288	0.198	0.909	0	0.769	0
nad4L_pos2	Overflow issues
nad4L_pos3	0	0.544	0.949	0	0.839	0
nad6_pos1	0.00715	0.331	0.776	0	0.535	0
nad6_pos2	0.03089	0.141	0.769	0	0.523	0
nad6_pos3	0	0.655	0.772	0.0037	0.527	0.0015
cob_pos1	0.03	0.161	0.684	0	0.36	0
cob_pos2	0.11177	0.066	0.683	0	0.359	0
cob_pos3	0	0.585	0.684	0.0005	0.36	0
nad1_pos1	0.01854	0.242	0.684	0	0.362	0.0002
nad1_pos2	0.05271	0.099	0.684	0	0.362	0
nad1_pos3	0	0.564	0.685	0.0001	0.364	0
